# Supplementary material for: Causes of Death Among Infants and Children in the Child Health and Mortality Prevention Surveillance (CHAMPS) Network
Source: PubMed Central journal article supplement (PMC10372710; doi:10.1001/jamanetworkopen.2023.22494), 2023-07-26
Supplement: jamanetwopen-e2322494-s001.pdf [file jamanetwopen-e2322494-s001.pdf]

## Supplementary Online Content

Bassat Q, Blau DM, Ogbuanu IU, et al; Child Health and Mortality Prevention Surveillance (CHAMPS) Network. Causes of death among infants and children in the Child Health and Mortality Prevention Surveillance (CHAMPS) Network. *JAMA Netw Open.* 2023;6(7):e2322494. doi:10.1001/jamanetworkopen.2023.22494

**eFigure 1.** Geographical Distribution and Number of Post-Neonatal Deaths Recruited Within the Different CHAMPS Network Sites

**eFigure 2.** Sunburst Diagram Allowing the Navigation Across Individual Causal Pathways (Full Sequence of Events) for Each of the 632 Included Deaths in This Analysis

**eFigure 3.** Opportunities for Intervention Identified by Expert DeCoDe Panelists Which Could Have Prevented Some of the Deaths

**eTable 1.** Median Number of Causes in the Chain of Events Leading to Death for the 5 Most Commonly Occurring Underlying Causes of Death and the Most Frequent Secondary Events Associated With the Underlying Diagnosis

**eTable 2.** Number of Identified Conditions in Causal Chain Leading to Death, by Selected Case Characteristics, CHAMPS Network (Sites in Manhiça, Mozambique; Soweto, South Africa; Kisumu and Siaya County, Kenya; Bamako, Mali; Baliakandi, Bangladesh; Makeni, Sierra Leone; Harar and Kersa, Ethiopia), December 2016–December 2020

**eTable 3.** Median Number of Identified Conditions (Range) in Causal Chain Leading to Death by Age Group and CHAMPS Site

**eTable 4.** Median Number of Different Causes in Chain of Events Leading to Death for 5 Most Common Underlying Causes and Most Frequently Associated Events

**eTable 5.** Underlying Data for the Sankey Diagram in Figure 1

**eTable 6.** Frequencies of Causes of Death According to Place of Death (Community vs. Facility) and to Position in the Causal Chain (Underlying, Immediate, or All Causes Pooled Together) (Sites in Manhiça, Mozambique; Soweto, South Africa; Kisumu and Siaya County, Kenya; Bamako, Mali; Baliakandi, Bangladesh; Makeni, Sierra Leone; Harar and Kersa, Ethiopia), December 2016–December 2020

**eTable 7.** Disease Events Caused by a Given Pathogen

**eTable 8.** Number of Times Pathogens Were Determined to Be in the Causal Chain Leading to Death

**eTable 9.** Preventability of Studied Deaths According to the Decode Panel, Stratified by Age Groups and Place of Death

This supplementary material has been provided by the authors to give readers additional information about their work.

eFigure 1: Geographical distribution and number of post-neonatal deaths recruited within the different CHAMPS network sites.

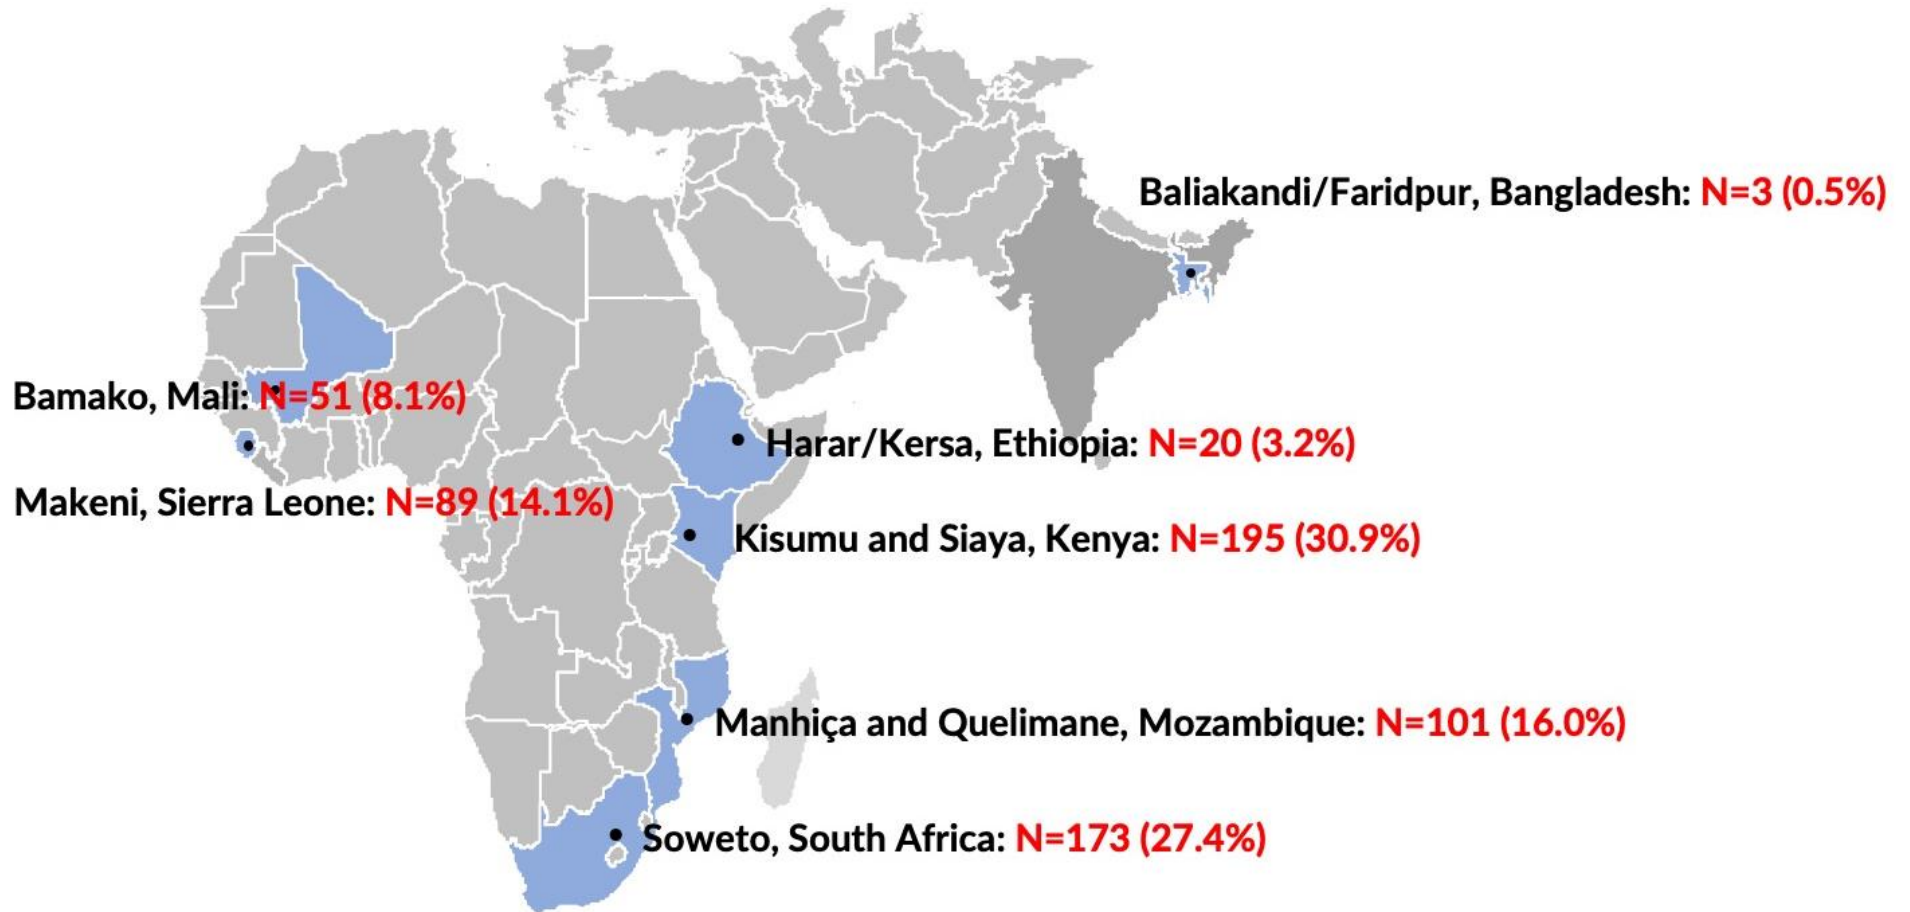

**eFigure 2:** Sunburst diagram allowing the navigation across individual causal pathways (full sequence of events) for each of the 632 included deaths in this analysis. To access this interactive material, please use the following link:

<https://champs-sunburst.netlify.app>

**Explanation:** By placing the cursor in the middle circle (n=632, 100% of the cases), and navigating outwards by radian, one can see how many cases (and what proportion) have been seen for each combination of diagnoses as part of the causal chain. As an example, we are showing the screenshots of the radian:

Total (100%)>>

+Malnutrition (16.5%) >>

+Lower respiratory infections (4.43%)>>

+Sepsis (1.74%)>>

+Meningitis/Encephalitis (0.158%) >>

+Diarrheal diseases (0.158%)

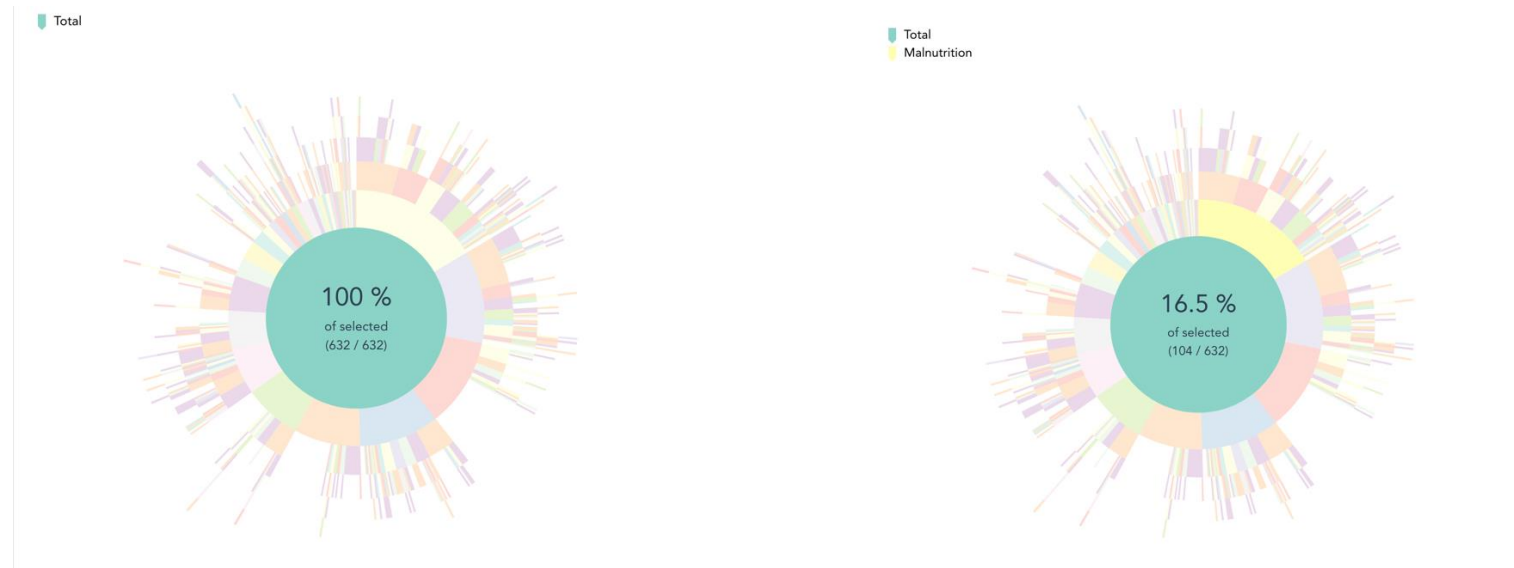

- Total
- Malnutrition
- Lower respiratory infections

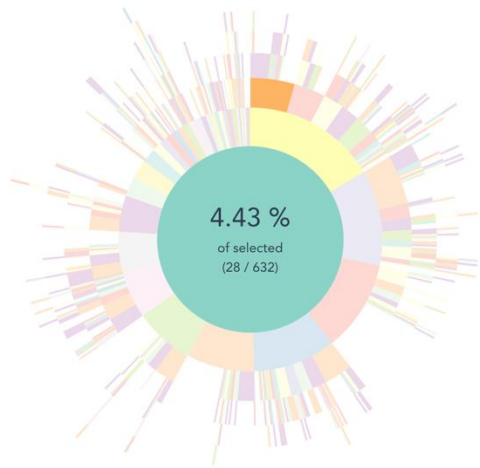

- Total
- Malnutrition
- Lower respiratory infections
- Sepsis

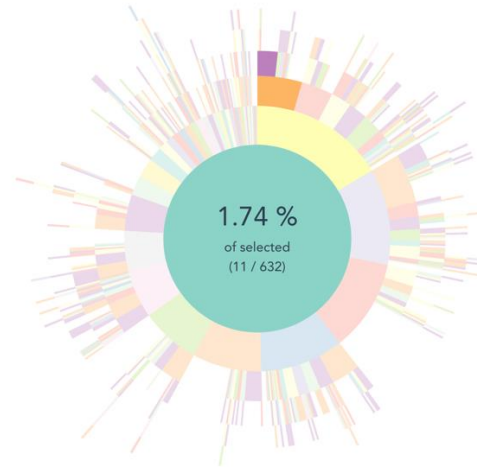

- Total
- Malnutrition
- Lower respiratory infections
- Sepsis
- Meningitis/Encephalitis

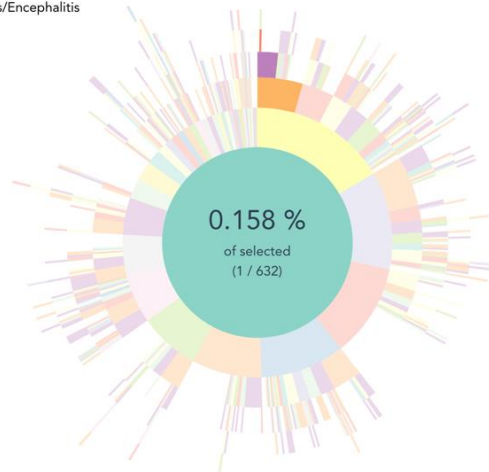

- Total
- Malnutrition
- Lower respiratory infections
- Sepsis
- Meningitis/Encephalitis
- Diarrheal Diseases

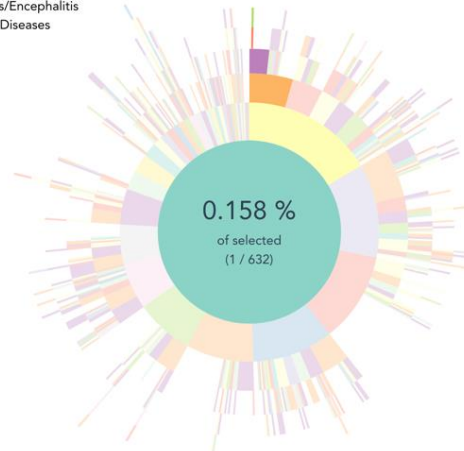

eFigure 3: Opportunities for intervention identified by Expert DeCoDe panelists which could have prevented some of the deaths.

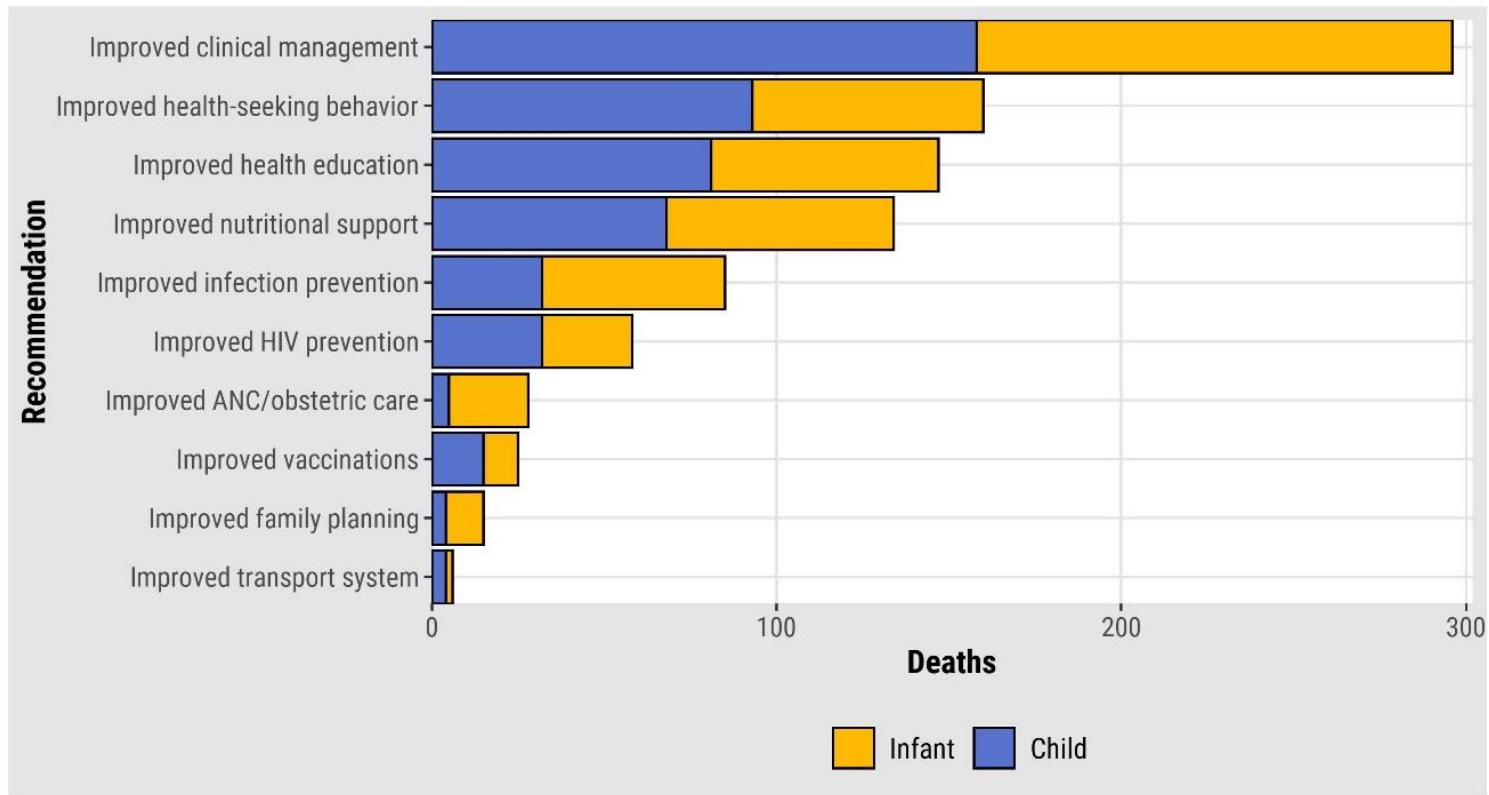

**eTable 1:** Median number of causes in the chain of events leading to death for the 5 most commonly occurring underlying causes of death and the most frequent secondary events associated with the underlying diagnosis.

| <b>Underlying causes</b>          | <b>Counts</b> | <b>Median number events (IQR)</b> | <b>Only 1 Additional cause n (%)</b> | <b>2 additional causes n (%)</b> | <b>3 additional causes n (%)</b> | <b>4 additional causes n (%)</b> | <b>&gt;4 additional causes n (%)</b> | <b>Most commonly reported associated event</b> | <b>Counts of associated most frequent event</b> |
|-----------------------------------|---------------|-----------------------------------|--------------------------------------|----------------------------------|----------------------------------|----------------------------------|--------------------------------------|------------------------------------------------|-------------------------------------------------|
| Malnutrition                      | 104           | 3 (2-4)                           | 32 (30.8)                            | 34 (32.7)                        | 27 (26.0)                        | 8 (7.7)                          | 1 (1.0)                              | Sepsis                                         | 56                                              |
| Human immunodeficiency virus      | 75            | 3 (2-3)                           | 25 (33.3)                            | 30 (40.0)                        | 10 (13.3)                        | 7 (9.3)                          | 0 (0)                                | LRTI                                           | 45                                              |
| Malaria                           | 71            | 1 (1-2)                           | 17 (23.9)                            | 8 (11.3)                         | 5 (7.0)                          | 0 (0)                            | 0 (0)                                | Anemias                                        | 16                                              |
| Congenital birth defects          | 64            | 3 (2-3)                           | 22 (34.4)                            | 24 (37.5)                        | 14 (21.9)                        | 1 (1.6)                          | 0 (0)                                | LRTI                                           | 34                                              |
| Lower respiratory tract infection | 53            | 1 (1-2)                           | 16 (30.2)                            | 5 (9.4)                          | 1 (1.9)                          | 1 (1.9)                          | 0 (0)                                | Sepsis                                         | 16                                              |

**eTable 2:** Number of identified conditions in causal chain leading to death, by selected case characteristics, CHAMPS Network (sites in Manhiça, Mozambique; Soweto, South Africa; Kisumu and Siaya county, Kenya; Bamako, Mali; Baliakandi, Bangladesh; Makeni, Sierra Leone; Harar and Kersa, Ethiopia), December 2016–December 2020.

|                                     | 0 (N=15)  | 1 (N=156) | 2 (N=194)  | 3 (N=146) | 4 (N=86)  | 5 (N=29)  | 6 (N=4)  | 7 (N=2)  | Total (N=632) |
|-------------------------------------|-----------|-----------|------------|-----------|-----------|-----------|----------|----------|---------------|
| <b>Age group</b>                    |           |           |            |           |           |           |          |          |               |
| Infant (28 days to <12 months)      | 11 (73.3) | 74 (47.4) | 107 (55.2) | 80 (54.8) | 42 (48.8) | 14 (48.3) | 2 (50.0) | 1 (50.0) | 331 (52.4)    |
| Child (12 months to <60 Months)     | 4 (26.7)  | 82 (52.6) | 87 (44.8)  | 66 (45.2) | 44 (51.2) | 15 (51.7) | 2 (50.0) | 1 (50.0) | 301 (47.6)    |
| <b>CHAMPS Site</b>                  |           |           |            |           |           |           |          |          |               |
| South Africa                        | 1 (6.7)   | 30 (19.2) | 50 (25.8)  | 47 (32.2) | 30 (34.9) | 12 (41.4) | 2 (50.0) | 1 (50.0) | 173 (27.4)    |
| Mozambique                          | 1 (6.7)   | 34 (21.8) | 42 (21.6)  | 17 (11.6) | 7 (8.1)   | 0 (0)     | 0 (0)    | 0 (0)    | 101 (16.0)    |
| Kenya                               | 6 (40.0)  | 67 (42.9) | 72 (37.1)  | 34 (23.3) | 15 (17.4) | 1 (3.4)   | 0 (0)    | 0 (0)    | 195 (30.8)    |
| Ethiopia                            | 0 (0)     | 1 (0.6)   | 2 (1.0)    | 6 (4.1)   | 4 (4.7)   | 6 (20.7)  | 1 (25.0) | 0 (0)    | 20 (3.2)      |
| Sierra Leone                        | 6 (40.0)  | 12 (7.7)  | 17 (8.8)   | 25 (17.1) | 24 (27.9) | 4 (13.8)  | 1 (25.0) | 0 (0)    | 89 (14.1)     |
| Mali                                | 1 (6.7)   | 12 (7.7)  | 10 (5.2)   | 16 (11.0) | 5 (5.8)   | 6 (20.7)  | 0 (0)    | 1 (50.0) | 51 (8.1)      |
| Bangladesh                          | 0 (0)     | 0 (0)     | 1 (0.5)    | 1 (0.5)   | 1 (0.5)   | 0 (0)     | 0 (0)    | 0 (0)    | 3 (0.5)       |
| <b>Location and timing of death</b> |           |           |            |           |           |           |          |          |               |
| Facility, ≤24 hours after admission | 4 (26.7)  | 64 (41.0) | 65 (33.5)  | 43 (29.5) | 28 (32.6) | 8 (27.6)  | 0 (0)    | 0 (0)    | 212 (33.5)    |
| Facility, >24 hours after admission | 1 (6.7)   | 34 (21.8) | 68 (35.1)  | 76 (52.1) | 45 (52.3) | 16 (55.2) | 3 (75.0) | 1 (50.0) | 244 (38.6)    |
| Community                           | 10 (66.7) | 58 (37.2) | 61 (31.4)  | 27 (18.5) | 13 (15.1) | 5 (17.2)  | 1 (25.0) | 1 (50.0) | 176 (27.8)    |

**eTable 3:** Median number of identified conditions (range) in causal chain leading to death by age group ad CHAMPS site

|                                    | <b>South Africa<br/>(N=173)</b> | <b>Mozambique<br/>(N=101)</b> | <b>Kenya<br/>(N=195)</b> | <b>Ethiopia<br/>(N=20)</b> | <b>Sierra Leone<br/>(N=89)</b> | <b>Mali<br/>(N=51)</b> | <b>Bangladesh<br/>(N=3)</b> | <b>Total<br/>(N=632)</b> |
|------------------------------------|---------------------------------|-------------------------------|--------------------------|----------------------------|--------------------------------|------------------------|-----------------------------|--------------------------|
| <b>Age group</b>                   |                                 |                               |                          |                            |                                |                        |                             |                          |
| Infant (28 days to <12 months)     | 3 (1-7)                         | 2 (0-3)                       | 2 (0-5)                  | 3 (1-4)                    | 2.5 (0-6)                      | 3 (0-5)                | 2.5 (2-3)                   | 2 (0-7)                  |
| Child (12 months to <60<br>Months) | 2 (0-6)                         | 2 (1-4)                       | 2 (0-4)                  | 5 (2-6)                    | 3 (0-5)                        | 3 (1-7)                | 4 (4-4)                     | 2 (0-7)                  |



**eTable 4:** Median number of different causes in chain of events leading to death for 5 most common underlying causes and most frequently associated events

|                              | Counts | Median length of chain of events | Most frequently associated cause |        | Second most frequently associated cause |        | Third most frequently associated cause |        |
|------------------------------|--------|----------------------------------|----------------------------------|--------|-----------------------------------------|--------|----------------------------------------|--------|
|                              |        |                                  | Cause                            | Number | Cause                                   | Number | Cause                                  | Number |
| Malnutrition                 | 104    | 3.0                              | Sepsis                           | 56     | Lower respiratory infections            | 52     | Malaria                                | 28     |
| HIV                          | 75     | 3.0                              | Lower respiratory infections     | 45     | Sepsis                                  | 31     | Malaria                                | 13     |
| Malaria                      | 71     | 1.0                              | Anemias                          | 16     | Other respiratory disease               | 9      | Sepsis                                 | 7      |
| Congenital birth defects     | 64     | 3.0                              | Lower respiratory infections     | 34     | Sepsis                                  | 27     | Other respiratory disease              | 10     |
| Lower Respiratory infections | 53     | 1.0                              | Sepsis                           | 16     | Meningitis/Encephalitis                 | 3      | Other respiratory disease              | 3      |

**eTable 5.** Underlying data for the Sankey diagram in **Figure 1**. Cases from Table Supplementary table S5 are discretized (i.e. rounded to the ceiling integer).

| <b>From_Stage</b> | <b>From</b>                  | <b>To_Stage</b> | <b>To</b>                    | <b>Cases</b> |
|-------------------|------------------------------|-----------------|------------------------------|--------------|
| Intermediate      | Lower respiratory infections | Immediate       | Sepsis                       | 55           |
| Underlying        | Malnutrition                 | Intermediate    | Lower respiratory infections | 19           |
| Underlying        | HIV                          | Intermediate    | Lower respiratory infections | 16           |
| Underlying        | Malnutrition                 | Intermediate    | Anemias                      | 15           |
| Intermediate      | Sepsis                       | Immediate       | Lower respiratory infections | 15           |
| Underlying        | HIV                          | Immediate       | Lower respiratory infections | 13           |
| Intermediate      | Meningitis/Encephalitis      | Immediate       | Sepsis                       | 12           |
| Intermediate      | Malnutrition                 | Immediate       | Sepsis                       | 11           |
| Underlying        | Malnutrition                 | Intermediate    | Malaria                      | 11           |
| Underlying        | Lower respiratory infections | Immediate       | Sepsis                       | 10           |
| Underlying        | Congenital birth defects     | Immediate       | Lower respiratory infections | 10           |
| Intermediate      | Malaria                      | Immediate       | Sepsis                       | 10           |
| Intermediate      | Diarrheal Diseases           | Immediate       | Sepsis                       | 10           |
| Underlying        | Malnutrition                 | Immediate       | Lower respiratory infections | 9            |
| Intermediate      | Anemias                      | Immediate       | Sepsis                       | 9            |
| Underlying        | Malnutrition                 | Immediate       | Malaria                      | 8            |
| Underlying        | Diarrheal Diseases           | Immediate       | Lower respiratory infections | 8            |
| Underlying        | Sepsis                       | Immediate       | Lower respiratory infections | 8            |
| Intermediate      | Malnutrition                 | Immediate       | Lower respiratory infections | 8            |
| Underlying        | Malnutrition                 | Intermediate    | Diarrheal Diseases           | 8            |
| Underlying        | Congenital birth defects     | Intermediate    | Malnutrition                 | 8            |
| Underlying        | Congenital birth defects     | Intermediate    | Lower respiratory infections | 8            |
| Underlying        | Malnutrition                 | Immediate       | Sepsis                       | 7            |
| Underlying        | Congenital birth defects     | Intermediate    | Other                        | 7            |
| Underlying        | HIV                          | Intermediate    | Malnutrition                 | 7            |

|              |                              |              |                              |   |
|--------------|------------------------------|--------------|------------------------------|---|
| Underlying   | Malnutrition                 | Intermediate | Sepsis                       | 7 |
| Intermediate | Other respiratory disease    | Immediate    | Lower respiratory infections | 7 |
| Underlying   | Neonatal preterm birth       | Intermediate | Lower respiratory infections | 7 |
| Underlying   | Injury                       | Intermediate | Lower respiratory infections | 7 |
| Underlying   | Malaria                      | Immediate    | Anemias                      | 6 |
| Underlying   | HIV                          | Immediate    | Malaria                      | 6 |
| Underlying   | Malnutrition                 | Immediate    | Diarrheal Diseases           | 6 |
| Intermediate | Other                        | Immediate    | Sepsis                       | 6 |
| Underlying   | HIV                          | Intermediate | Diarrheal Diseases           | 6 |
| Underlying   | HIV                          | Intermediate | Sepsis                       | 6 |
| Underlying   | Injury                       | Immediate    | Sepsis                       | 5 |
| Intermediate | Anemias                      | Immediate    | Malaria                      | 5 |
| Underlying   | Malaria                      | Immediate    | Lower respiratory infections | 5 |
| Underlying   | Diarrheal Diseases           | Immediate    | Sepsis                       | 5 |
| Underlying   | HIV                          | Intermediate | Other infections             | 5 |
| Intermediate | Malaria                      | Immediate    | Lower respiratory infections | 5 |
| Underlying   | Malaria                      | Intermediate | Anemias                      | 5 |
| Intermediate | Anemias                      | Immediate    | Lower respiratory infections | 5 |
| Underlying   | Neonatal preterm birth       | Intermediate | Sepsis                       | 5 |
| Intermediate | Other infections             | Immediate    | Sepsis                       | 5 |
| Underlying   | Malnutrition                 | Intermediate | Meningitis/Encephalitis      | 5 |
| Intermediate | Other infections             | Immediate    | Lower respiratory infections | 5 |
| Intermediate | Lower respiratory infections | Immediate    | Other infections             | 4 |
| Intermediate | Malnutrition                 | Immediate    | Malaria                      | 4 |
| Underlying   | Neonatal preterm birth       | Immediate    | Lower respiratory infections | 4 |
| Underlying   | Congenital birth defects     | Intermediate | Other respiratory disease    | 4 |
| Underlying   | Neonatal preterm birth       | Immediate    | Sepsis                       | 4 |
| Underlying   | Sepsis                       | Immediate    | Meningitis/Encephalitis      | 4 |
| Underlying   | Neonatal preterm birth       | Intermediate | Meningitis/Encephalitis      | 4 |
| Intermediate | Other respiratory disease    | Immediate    | Sepsis                       | 4 |

|              |                              |              |                              |   |
|--------------|------------------------------|--------------|------------------------------|---|
| Underlying   | Diarrheal Diseases           | Intermediate | Lower respiratory infections | 4 |
| Underlying   | HIV                          | Intermediate | Malaria                      | 4 |
| Intermediate | Meningitis/Encephalitis      | Immediate    | Lower respiratory infections | 4 |
| Underlying   | Malaria                      | Intermediate | Malnutrition                 | 4 |
| Underlying   | Congenital birth defects     | Intermediate | Sepsis                       | 4 |
| Underlying   | Neonatal preterm birth       | Intermediate | Other neonatal disorders     | 4 |
| Intermediate | Other neurological disorders | Immediate    | Lower respiratory infections | 4 |
| Underlying   | Malaria                      | Immediate    | Sepsis                       | 3 |
| Intermediate | Diarrheal Diseases           | Immediate    | Other respiratory disease    | 3 |
| Underlying   | Malaria                      | Immediate    | Other respiratory disease    | 3 |
| Underlying   | Diarrheal Diseases           | Immediate    | Other respiratory disease    | 3 |
| Underlying   | HIV                          | Immediate    | Sepsis                       | 3 |
| Underlying   | Congenital birth defects     | Immediate    | Other respiratory disease    | 3 |
| Underlying   | Congenital birth defects     | Immediate    | Sepsis                       | 3 |
| Underlying   | Sepsis                       | Intermediate | Anemias                      | 3 |
| Intermediate | Diarrheal Diseases           | Immediate    | Lower respiratory infections | 3 |
| Intermediate | Sepsis                       | Immediate    | Other respiratory disease    | 3 |
| Intermediate | Anemias                      | Immediate    | Other respiratory disease    | 3 |
| Underlying   | Neonatal preterm birth       | Intermediate | Malnutrition                 | 3 |
| Underlying   | Injury                       | Intermediate | Malnutrition                 | 3 |
| Underlying   | Malaria                      | Intermediate | Other respiratory disease    | 3 |
| Intermediate | Sepsis                       | Immediate    | Other infections             | 3 |
| Intermediate | Malnutrition                 | Immediate    | Anemias                      | 3 |
| Intermediate | Malaria                      | Immediate    | Diarrheal Diseases           | 3 |
| Underlying   | Injury                       | Intermediate | Sepsis                       | 3 |
| Underlying   | Congenital birth defects     | Intermediate | Neonatal preterm birth       | 3 |
| Underlying   | HIV                          | Intermediate | Anemias                      | 3 |
| Underlying   | Lower respiratory infections | Immediate    | Other respiratory disease    | 2 |
| Underlying   | Other neonatal disorders     | Immediate    | Lower respiratory infections | 2 |
| Underlying   | Other skin and subcutaneous  | Immediate    | Sepsis                       | 2 |

|              |                                |              |                              |   |
|--------------|--------------------------------|--------------|------------------------------|---|
| Underlying   | Paralytic ileus and intestinal | Immediate    | Other respiratory disease    | 2 |
| Underlying   | Other                          | Immediate    | Sepsis                       | 2 |
| Underlying   | Other respiratory disease      | Immediate    | Lower respiratory infections | 2 |
| Underlying   | Congenital birth defects       | Intermediate | Other infections             | 2 |
| Intermediate | Malnutrition                   | Immediate    | Other respiratory disease    | 2 |
| Underlying   | Sepsis                         | Immediate    | Anemias                      | 2 |
| Underlying   | Other neurological disorders   | Immediate    | Other respiratory disease    | 2 |
| Underlying   | Malnutrition                   | Intermediate | Other respiratory disease    | 2 |
| Underlying   | Malnutrition                   | Immediate    | Other infections             | 2 |
| Intermediate | Sepsis                         | Immediate    | Diarrheal Diseases           | 2 |
| Intermediate | Anemias                        | Immediate    | Meningitis/Encephalitis      | 2 |
| Intermediate | Lower respiratory infections   | Immediate    | Meningitis/Encephalitis      | 2 |
| Intermediate | Other neonatal disorders       | Immediate    | Sepsis                       | 2 |
| Intermediate | Lower respiratory infections   | Immediate    | Other respiratory disease    | 2 |
| Intermediate | Neonatal preterm birth         | Immediate    | Sepsis                       | 2 |
| Underlying   | Malnutrition                   | Intermediate | Other immunodeficiencies     | 2 |
| Intermediate | Sepsis                         | Immediate    | Meningitis/Encephalitis      | 2 |
| Intermediate | Sickle cell disorders          | Immediate    | Lower respiratory infections | 2 |
| Intermediate | Other neonatal disorders       | Immediate    | Meningitis/Encephalitis      | 2 |
| Underlying   | Diarrheal Diseases             | Intermediate | Malnutrition                 | 2 |
| Intermediate | Other                          | Immediate    | Lower respiratory infections | 2 |
| Underlying   | Neonatal preterm birth         | Intermediate | Congenital birth defects     | 2 |
| Intermediate | Anemias                        | Immediate    | Diarrheal Diseases           | 2 |
| Underlying   | Other endocrine, metabolic,    | Intermediate | Lower respiratory infections | 2 |
| Intermediate | Tuberculosis                   | Immediate    | Lower respiratory infections | 2 |
| Underlying   | Injury                         | Intermediate | Meningitis/Encephalitis      | 2 |
| Underlying   | Congenital birth defects       | Intermediate | Meningitis/Encephalitis      | 2 |
| Intermediate | Congenital birth defects       | Immediate    | Sepsis                       | 2 |
| Underlying   | HIV                            | Intermediate | Meningitis/Encephalitis      | 2 |
| Underlying   | Lower respiratory infections   | Intermediate | Malaria                      | 2 |

|              |                                |              |                              |   |
|--------------|--------------------------------|--------------|------------------------------|---|
| Underlying   | Sepsis                         | Intermediate | Malnutrition                 | 2 |
| Intermediate | Kidney Disease                 | Immediate    | Lower respiratory infections | 2 |
| Underlying   | Diarrheal Diseases             | Intermediate | Sepsis                       | 2 |
| Intermediate | Lower respiratory infections   | Immediate    | Diarrheal Diseases           | 2 |
| Underlying   | Other infections               | Intermediate | Malnutrition                 | 1 |
| Intermediate | Lower respiratory infections   | Immediate    | Anemias                      | 1 |
| Underlying   | Injury                         | Immediate    | Other respiratory disease    | 1 |
| Underlying   | Lower respiratory infections   | Intermediate | Diarrheal Diseases           | 1 |
| Underlying   | Congenital birth defects       | Immediate    | Meningitis/Encephalitis      | 1 |
| Underlying   | Measles                        | Immediate    | Lower respiratory infections | 1 |
| Underlying   | Lower respiratory infections   | Immediate    | Injury                       | 1 |
| Underlying   | Sepsis                         | Immediate    | Other respiratory disease    | 1 |
| Underlying   | Congenital birth defects       | Immediate    | Liver disease                | 1 |
| Intermediate | Other respiratory disease      | Immediate    | Neonatal sepsis              | 1 |
| Underlying   | Heart Diseases                 | Immediate    | Liver Disease                | 1 |
| Underlying   | Paralytic ileus and intestinal | Immediate    | Poisoning                    | 1 |
| Intermediate | Sepsis                         | Immediate    | Malaria                      | 1 |
| Underlying   | Malnutrition                   | Intermediate | Sickle cell disorders        | 1 |
| Underlying   | Other skin and subcutaneous    | Intermediate | Lower respiratory infections | 1 |
| Underlying   | HIV                            | Immediate    | Other infections             | 1 |
| Underlying   | HIV                            | Immediate    | Diarrheal Diseases           | 1 |
| Underlying   | Sepsis                         | Intermediate | Malaria                      | 1 |
| Underlying   | Lower respiratory infections   | Immediate    | Diarrheal Diseases           | 1 |
| Underlying   | Heart Diseases                 | Intermediate | Other neurological disorders | 1 |
| Underlying   | Neonatal preterm birth         | Intermediate | Malaria                      | 1 |
| Intermediate | Malnutrition                   | Immediate    | Diarrheal Diseases           | 1 |
| Intermediate | Meningitis/Encephalitis        | Immediate    | Other infections             | 1 |
| Underlying   | Other                          | Intermediate | Other respiratory disease    | 1 |
| Underlying   | Neonatal preterm birth         | Immediate    | Other neonatal disorders     | 1 |
| Underlying   | Other infections               | Immediate    | Sepsis                       | 1 |

|              |                              |              |                              |   |
|--------------|------------------------------|--------------|------------------------------|---|
| Intermediate | Anemias                      | Immediate    | Malnutrition                 | 1 |
| Underlying   | Congenital birth defects     | Intermediate | Anemias                      | 1 |
| Intermediate | Other respiratory disease    | Immediate    | Anemias                      | 1 |
| Underlying   | Meningitis/Encephalitis      | Immediate    | Anemias                      | 1 |
| Underlying   | Neonatal preterm birth       | Intermediate | Other                        | 1 |
| Underlying   | Congenital infection         | Immediate    | Neonatal sepsis              | 1 |
| Underlying   | Cancer                       | Immediate    | Anemias                      | 1 |
| Underlying   | Measles                      | Intermediate | Sepsis                       | 1 |
| Underlying   | Congenital birth defects     | Immediate    | Epilepsy                     | 1 |
| Underlying   | Liver disease                | Intermediate | Malnutrition                 | 1 |
| Underlying   | Congenital infection         | Immediate    | Sepsis                       | 1 |
| Underlying   | Anemias                      | Intermediate | Lower respiratory infections | 1 |
| Intermediate | Other                        | Immediate    | Other neonatal disorders     | 1 |
| Underlying   | Meningitis/Encephalitis      | Intermediate | Sepsis                       | 1 |
| Underlying   | Malnutrition                 | Intermediate | Other                        | 1 |
| Underlying   | Meningitis/Encephalitis      | Intermediate | Anemias                      | 1 |
| Underlying   | Congenital birth defects     | Immediate    | Malnutrition                 | 1 |
| Underlying   | HIV exposure                 | Immediate    | Other skin and subcutaneous  | 1 |
| Underlying   | Congenital birth defects     | Immediate    | Heart Diseases               | 1 |
| Intermediate | Lower respiratory infections | Immediate    | Tuberculosis                 | 1 |
| Underlying   | Sickle cell disorders        | Immediate    | Sepsis                       | 1 |
| Underlying   | Lower respiratory infections | Immediate    | Other infections             | 1 |
| Underlying   | Meningitis/Encephalitis      | Intermediate | Liver disease                | 1 |
| Underlying   | Lower respiratory infections | Intermediate | Sepsis                       | 1 |
| Underlying   | Other                        | Intermediate | Malnutrition                 | 1 |
| Underlying   | Diarrheal Diseases           | Immediate    | Other infections             | 1 |
| Intermediate | Liver disease                | Immediate    | Malnutrition                 | 1 |
| Underlying   | Liver Disease                | Intermediate | Meningitis/Encephalitis      | 1 |
| Intermediate | Other                        | Immediate    | Heart Diseases               | 1 |
| Intermediate | Poisoning                    | Immediate    | Diarrheal Diseases           | 1 |

|              |                              |              |                              |   |
|--------------|------------------------------|--------------|------------------------------|---|
| Underlying   | Tuberculosis                 | Immediate    | Lower respiratory infections | 1 |
| Underlying   | Injury                       | Intermediate | Other neurological disorders | 1 |
| Underlying   | Congenital birth defects     | Immediate    | Liver Disease                | 1 |
| Underlying   | Liver Disease                | Intermediate | Other respiratory disease    | 1 |
| Underlying   | Lower respiratory infections | Intermediate | Other respiratory disease    | 1 |
| Underlying   | Other endocrine, metabolic,  | Immediate    | Meningitis/Encephalitis      | 1 |
| Underlying   | HIV                          | Intermediate | Poisoning                    | 1 |
| Underlying   | Other neurological disorders | Intermediate | Lower respiratory infections | 1 |
| Underlying   | Poisoning                    | Immediate    | Lower respiratory infections | 1 |
| Underlying   | Diarrheal Diseases           | Immediate    | Other disorders of fluid,    | 1 |
| Underlying   | Injury                       | Immediate    | Other infections             | 1 |
| Underlying   | Malaria                      | Intermediate | Diarrheal Diseases           | 1 |
| Underlying   | Other infections             | Intermediate | Tuberculosis                 | 1 |
| Underlying   | Neonatal preterm birth       | Intermediate | Kidney Disease               | 1 |
| Underlying   | Tuberculosis                 | Immediate    | Other infections             | 1 |
| Intermediate | Injury                       | Immediate    | Sepsis                       | 1 |
| Underlying   | Injury                       | Immediate    | Lower respiratory infections | 1 |
| Intermediate | Other immunodeficiencies     | Immediate    | Other infections             | 1 |
| Intermediate | Sepsis                       | Immediate    | Congenital infection         | 1 |
| Underlying   | Other endocrine, metabolic,  | Immediate    | Congenital birth defects     | 1 |
| Underlying   | Cancer                       | Immediate    | Poisoning                    | 1 |
| Underlying   | Measles                      | Immediate    | Sepsis                       | 1 |
| Underlying   | Motor neuron disease         | Immediate    | Lower respiratory infections | 1 |
| Underlying   | Epilepsy                     | Immediate    | Other respiratory disease    | 1 |
| Underlying   | Neonatal preterm birth       | Intermediate | Neonatal encephalopathy      | 1 |
| Underlying   | Lower respiratory infections | Immediate    | Meningitis/Encephalitis      | 1 |
| Intermediate | Neonatal encephalopathy      | Immediate    | Lower respiratory infections | 1 |
| Intermediate | Anemias                      | Immediate    | Other endocrine, metabolic,  | 1 |
| Intermediate | Other skin and subcutaneous  | Immediate    | Sepsis                       | 1 |
| Underlying   | Malnutrition                 | Intermediate | Other skin and subcutaneous  | 1 |



|              |                                |              |                                |   |
|--------------|--------------------------------|--------------|--------------------------------|---|
| Underlying   | Lower respiratory infections   | Intermediate | Meningitis/Encephalitis        | 1 |
| Intermediate | Sepsis                         | Immediate    | Liver Disease                  | 1 |
| Underlying   | Upper respiratory infections   | Immediate    | Lower respiratory infections   | 1 |
| Underlying   | Congenital birth defects       | Intermediate | Paralytic ileus and intestinal | 1 |
| Intermediate | Paralytic ileus and intestinal | Immediate    | Sepsis                         | 1 |
| Underlying   | Other                          | Immediate    | Malnutrition                   | 1 |
| Intermediate | Neonatal preterm birth         | Immediate    | Lower respiratory infections   | 1 |
| Underlying   | Neonatal preterm birth         | Intermediate | Other infections               | 1 |
| Underlying   | Lower respiratory infections   | Intermediate | Malnutrition                   | 1 |
| Underlying   | Lower respiratory infections   | Intermediate | Anemias                        | 1 |
| Intermediate | Upper respiratory infections   | Immediate    | Sepsis                         | 1 |
| Intermediate | Other infections               | Immediate    | Meningitis/Encephalitis        | 1 |
| Underlying   | Malnutrition                   | Intermediate | Other infections               | 1 |
| Underlying   | Diarrheal Diseases             | Intermediate | Other endocrine, metabolic,    | 1 |
| Underlying   | Diarrheal Diseases             | Intermediate | Other neurological disorders   | 1 |
| Intermediate | Other endocrine, metabolic,    | Immediate    | Lower respiratory infections   | 1 |
| Underlying   | Congenital infection           | Intermediate | Lower respiratory infections   | 1 |
| Intermediate | Congenital birth defects       | Immediate    | Lower respiratory infections   | 1 |
| Underlying   | Other                          | Intermediate | Sepsis                         | 1 |
| Intermediate | Sepsis                         | Immediate    | Anemias                        | 1 |
| Underlying   | Malnutrition                   | Intermediate | Injury                         | 1 |
| Intermediate | Congenital birth defects       | Immediate    | Other respiratory disease      | 1 |
| Underlying   | Congenital birth defects       | Intermediate | Heart Diseases                 | 1 |
| Underlying   | Diarrheal Diseases             | Intermediate | Meningitis/Encephalitis        | 1 |
| Intermediate | Anemias                        | Immediate    | Tuberculosis                   | 1 |
| Underlying   | Other neonatal disorders       | Intermediate | Meningitis/Encephalitis        | 1 |
| Underlying   | Other neonatal disorders       | Intermediate | Lower respiratory infections   | 1 |
| Intermediate | Other immunodeficiencies       | Immediate    | Sepsis                         | 1 |
| Intermediate | Heart Diseases                 | Immediate    | Lower respiratory infections   | 1 |
| Intermediate | Congenital infection           | Immediate    | Lower respiratory infections   | 1 |

|              |                                |              |                                |   |
|--------------|--------------------------------|--------------|--------------------------------|---|
| Underlying   | Other infections               | Intermediate | Anemias                        | 1 |
| Underlying   | Congenital birth defects       | Intermediate | Upper respiratory infections   | 1 |
| Underlying   | Other infections               | Intermediate | Sepsis                         | 1 |
| Intermediate | Sepsis                         | Immediate    | Other endocrine, metabolic,    | 1 |
| Underlying   | Other respiratory disease      | Intermediate | Other                          | 1 |
| Underlying   | Other respiratory disease      | Intermediate | Sickle cell disorders          | 1 |
| Underlying   | Malaria                        | Intermediate | Injury                         | 1 |
| Underlying   | Other                          | Intermediate | Lower respiratory infections   | 1 |
| Underlying   | Injury                         | Intermediate | Malaria                        | 1 |
| Intermediate | Anemias                        | Immediate    | Poisoning                      | 1 |
| Intermediate | Malnutrition                   | Immediate    | Poisoning                      | 1 |
| Underlying   | Neonatal preterm birth         | Intermediate | Congenital infection           | 1 |
| Intermediate | Malaria                        | Immediate    | Anemias                        | 1 |
| Underlying   | Other immunodeficiencies       | Intermediate | Congenital birth defects       | 1 |
| Underlying   | Other immunodeficiencies       | Intermediate | Lower respiratory infections   | 1 |
| Underlying   | Sepsis                         | Intermediate | Lower respiratory infections   | 1 |
| Intermediate | Malaria                        | Immediate    | Tuberculosis                   | 1 |
| Intermediate | Lower respiratory infections   | Immediate    | Neonatal sepsis                | 1 |
| Intermediate | Meningitis/Encephalitis        | Immediate    | Neonatal sepsis                | 1 |
| Underlying   | Neonatal preterm birth         | Intermediate | Diarrheal Diseases             | 1 |
| Underlying   | Diarrheal Diseases             | Intermediate | Anemias                        | 1 |
| Intermediate | Other gastrointestinal disease | Immediate    | Sepsis                         | 1 |
| Underlying   | Cancer                         | Intermediate | Lower respiratory infections   | 1 |
| Underlying   | Cancer                         | Intermediate | Meningitis/Encephalitis        | 1 |
| Underlying   | Perinatal asphyxia/hypoxia     | Intermediate | Meningitis/Encephalitis        | 1 |
| Underlying   | Congenital birth defects       | Intermediate | Malaria                        | 1 |
| Intermediate | Other respiratory disease      | Immediate    | Other endocrine, metabolic,    | 1 |
| Underlying   | Congenital birth defects       | Intermediate | Other gastrointestinal disease | 1 |
| Intermediate | Poisoning                      | Immediate    | Sepsis                         | 1 |
| Intermediate | Other neonatal disorders       | Immediate    | Other infections               | 1 |

|              |                              |              |                              |   |
|--------------|------------------------------|--------------|------------------------------|---|
| Underlying   | Other respiratory disease    | Intermediate | Poisoning                    | 1 |
| Underlying   | Malaria                      | Intermediate | Lower respiratory infections | 1 |
| Underlying   | Other respiratory disease    | Intermediate | Meningitis/Encephalitis      | 1 |
| Underlying   | Malaria                      | Intermediate | Other endocrine, metabolic,  | 1 |
| Intermediate | Other endocrine, metabolic,  | Immediate    | Other respiratory disease    | 1 |
| Underlying   | Perinatal asphyxia/hypoxia   | Intermediate | Lower respiratory infections | 1 |
| Intermediate | Other                        | Immediate    | Other respiratory disease    | 1 |
| Intermediate | Other skin and subcutaneous  | Immediate    | Lower respiratory infections | 1 |
| Underlying   | HIV                          | Intermediate | Other skin and subcutaneous  | 1 |
| Intermediate | Diarrheal Diseases           | Immediate    | Anemias                      | 1 |
| Underlying   | Diarrheal Diseases           | Intermediate | Other disorders of fluid,    | 1 |
| Underlying   | Diarrheal Diseases           | Intermediate | Kidney Disease               | 1 |
| Intermediate | Malnutrition                 | Immediate    | Other                        | 1 |
| Intermediate | Liver Disease                | Immediate    | Lower respiratory infections | 1 |
| Intermediate | Sepsis                       | Immediate    | Kidney Disease               | 1 |
| Intermediate | Meningitis/Encephalitis      | Immediate    | Kidney Disease               | 1 |
| Intermediate | Meningitis/Encephalitis      | Immediate    | Diarrheal Diseases           | 1 |
| Underlying   | Other endocrine, metabolic,  | Intermediate | Meningitis/Encephalitis      | 1 |
| Intermediate | Malaria                      | Immediate    | Other                        | 1 |
| Underlying   | Congenital infection         | Intermediate | Sepsis                       | 1 |
| Underlying   | Congenital infection         | Intermediate | Meningitis/Encephalitis      | 1 |
| Intermediate | Lower respiratory infections | Immediate    | Other                        | 1 |
| Underlying   | Malnutrition                 | Intermediate | Measles                      | 1 |
| Intermediate | Measles                      | Immediate    | Lower respiratory infections | 1 |
| Intermediate | Meningitis/Encephalitis      | Immediate    | Other                        | 1 |
| Intermediate | Sepsis                       | Immediate    | Other                        | 1 |
| Underlying   | Other neurological disorders | Intermediate | Other respiratory disease    | 1 |
| Underlying   | Other neurological disorders | Intermediate | Other                        | 1 |
| Intermediate | Heart Diseases               | Immediate    | Sepsis                       | 1 |
| Underlying   | Congenital infection         | Intermediate | Other neonatal disorders     | 1 |

|              |                              |              |                              |   |
|--------------|------------------------------|--------------|------------------------------|---|
| Underlying   | Liver disease                | Intermediate | Lower respiratory infections | 1 |
| Underlying   | Liver disease                | Intermediate | Meningitis/Encephalitis      | 1 |
| Underlying   | Liver disease                | Intermediate | Liver Disease                | 1 |
| Intermediate | Liver Disease                | Immediate    | Sepsis                       | 1 |
| Intermediate | Malnutrition                 | Immediate    | Liver disease                | 1 |
| Intermediate | Malaria                      | Immediate    | Liver disease                | 1 |
| Intermediate | Anemias                      | Immediate    | Liver disease                | 1 |
| Intermediate | Lower respiratory infections | Immediate    | Kidney Disease               | 1 |
| Underlying   | Other endocrine, metabolic,  | Intermediate | Upper respiratory infections | 1 |
| Underlying   | HIV                          | Intermediate | Tuberculosis                 | 1 |
| Underlying   | Other neurological disorders | Intermediate | Other infections             | 1 |
| Intermediate | Anemias                      | Immediate    | Other                        | 1 |
| Intermediate | Other neurological disorders | Immediate    | Meningitis/Encephalitis      | 1 |
| Intermediate | Other                        | Immediate    | Meningitis/Encephalitis      | 1 |
| Underlying   | Neonatal encephalopathy      | Intermediate | Other neurological disorders | 1 |
| Underlying   | Other neurological disorders | Intermediate | Congenital birth defects     | 1 |
| Intermediate | Other neonatal disorders     | Immediate    | Lower respiratory infections | 1 |
| Underlying   | Neonatal encephalopathy      | Intermediate | Other                        | 1 |
| Underlying   | Neonatal encephalopathy      | Intermediate | Other infections             | 1 |
| Underlying   | HIV                          | Intermediate | Other respiratory disease    | 1 |
| Underlying   | Neonatal preterm birth       | Intermediate | Other neurological disorders | 1 |
| Underlying   | Neonatal preterm birth       | Intermediate | Other respiratory disease    | 1 |
| Underlying   | Other neurological disorders | Intermediate | Meningitis/Encephalitis      | 1 |
| Underlying   | Congenital infection         | Intermediate | Heart Diseases               | 1 |
| Underlying   | Other neurological disorders | Intermediate | Malnutrition                 | 1 |
| Intermediate | Diarrheal Diseases           | Immediate    | Other disorders of fluid,    | 1 |
| Intermediate | Sepsis                       | Immediate    | Other disorders of fluid,    | 1 |
| Intermediate | Anemias                      | Immediate    | Other disorders of fluid,    | 1 |
| Underlying   | HIV                          | Intermediate | Liver Disease                | 1 |
| Intermediate | Other endocrine, metabolic,  | Immediate    | Sepsis                       | 1 |

|              |                              |              |                              |   |
|--------------|------------------------------|--------------|------------------------------|---|
| Underlying   | Malnutrition                 | Intermediate | Other endocrine, metabolic,  | 1 |
| Underlying   | Diarrheal Diseases           | Intermediate | Other neonatal disorders     | 1 |
| Underlying   | Congenital infection         | Intermediate | Other respiratory disease    | 1 |
| Underlying   | Congenital infection         | Intermediate | Diarrheal Diseases           | 1 |
| Intermediate | Kidney Disease               | Immediate    | Meningitis/Encephalitis      | 1 |
| Intermediate | Other disorders of fluid,    | Immediate    | Meningitis/Encephalitis      | 1 |
| Underlying   | Sepsis                       | Intermediate | Neonatal preterm birth       | 1 |
| Underlying   | Sepsis                       | Intermediate | Other neonatal disorders     | 1 |
| Intermediate | Neonatal preterm birth       | Immediate    | Meningitis/Encephalitis      | 1 |
| Underlying   | Congenital infection         | Intermediate | Congenital birth defects     | 1 |
| Underlying   | Congenital infection         | Intermediate | Other infections             | 1 |
| Intermediate | Malnutrition                 | Immediate    | Meningitis/Encephalitis      | 1 |
| Intermediate | Other disorders of fluid,    | Immediate    | Lower respiratory infections | 1 |
| Intermediate | Sepsis                       | Immediate    | Epilepsy                     | 1 |
| Underlying   | Other endocrine, metabolic,  | Intermediate | Diarrheal Diseases           | 1 |
| Intermediate | Diarrheal Diseases           | Immediate    | Epilepsy                     | 1 |
| Intermediate | Other immunodeficiencies     | Immediate    | Epilepsy                     | 1 |
| Intermediate | Malnutrition                 | Immediate    | Epilepsy                     | 1 |
| Intermediate | Other neurological disorders | Immediate    | Epilepsy                     | 1 |
| Underlying   | Other endocrine, metabolic,  | Intermediate | Other neurological disorders | 1 |
| Underlying   | Other endocrine, metabolic,  | Intermediate | Malnutrition                 | 1 |
| Underlying   | Other endocrine, metabolic,  | Intermediate | Other immunodeficiencies     | 1 |
| Underlying   | Other endocrine, metabolic,  | Intermediate | Sepsis                       | 1 |

**eTable 6.** Frequencies of causes of death according to place of death (Community vs. facility) and to position in the causal chain (Underlying, Immediate, or all causes pooled together) (sites in Manhiça, Mozambique; Soweto, South Africa; Kisumu and Siaya county, Kenya; Bamako, Mali; Baliakandi, Bangladesh; Makeni, Sierra Leone; Harar and Kersa, Ethiopia), December 2016–December 2020.

|                                                         | Underlying                    |                              | Immediate                     |                              | All <sup>a</sup>              |                              | p-value <sup>b</sup> |
|---------------------------------------------------------|-------------------------------|------------------------------|-------------------------------|------------------------------|-------------------------------|------------------------------|----------------------|
|                                                         | Community<br>(N=176)<br>N (%) | Facility<br>(N=456)<br>N (%) | Community<br>(N=176)<br>N (%) | Facility<br>(N=456)<br>N (%) | Community<br>(N=176)<br>N (%) | Facility<br>(N=456)<br>N (%) |                      |
| Lower respiratory infections                            | 14 (8.0)                      | 39 (8.6)                     | 29 (16.5)                     | 100 (21.9)                   | 61 (34.7)                     | 219 (48.0)                   | 0.002                |
| Sepsis                                                  | 9 (5.1)                       | 20 (4.4)                     | 53 (30.1)                     | 138 (30.3)                   | 61 (34.7)                     | 192 (41.5)                   | 0.103                |
| Malnutrition                                            | 34 (19.3)                     | 70 (15.4)                    | 2 (1.1)                       | 0 (0)                        | 51 (29.0)                     | 99 (21.7)                    | 0.061                |
| Malaria                                                 | 21 (11.9)                     | 50 (11.0)                    | 21 (11.9)                     | 23 (5.0)                     | 36 (20.5)                     | 87 (19.1)                    | 0.737                |
| Diarrheal Diseases                                      | 9 (5.1)                       | 37 (8.1)                     | 6 (3.4)                       | 20 (4.4)                     | 21 (11.9)                     | 69 (15.1)                    | 0.374                |
| HIV                                                     | 19 (10.8)                     | 56 (12.3)                    | 0 (0)                         | 1 (0.2)                      | 19 (10.8)                     | 56 (12.3)                    | 0.682                |
| Congenital birth defects                                | 8 (4.5)                       | 56 (12.3)                    | 1 (0.6)                       | 1 (0.2)                      | 8 (4.6)                       | 62 (13.6)                    | <0.001               |
| Other respiratory disease                               | 8 (4.6)                       | 7 (1.5)                      | 7 (4.0)                       | 29 (6.4)                     | 16 (9.1)                      | 48 (10.5)                    | 0.661                |
| Anemias                                                 | 1 (0.6)                       | 0 (0)                        | 1 (0.6)                       | 14 (3.1)                     | 3 (1.7)                       | 59 (12.9)                    | <0.001               |
| Meningitis/Encephalitis                                 | 1 (0.6)                       | 5 (1.1)                      | 4 (2.3)                       | 15 (3.3)                     | 9 (5.1)                       | 48 (10.5)                    | 0.043                |
| Other infections                                        | 2 (1.1)                       | 9 (2.0)                      | 3 (1.7)                       | 15 (3.3)                     | 8 (4.6)                       | 36 (7.9)                     | 0.164                |
| Neonatal preterm birth complications                    | 7 (4.0)                       | 30 (6.6)                     | 0 (0)                         | 0 (0)                        | 7 (4.0)                       | 35 (7.7)                     | 0.110                |
| Injury                                                  | 7 (4.0)                       | 24 (5.3)                     | 2 (1.1)                       | 2 (0.4)                      | 9 (5.1)                       | 25 (5.5)                     | 1                    |
| Other                                                   | 3 (1.7)                       | 3 (0.7)                      | 0 (0)                         | 2 (0.4)                      | 10 (5.7)                      | 14 (3.1)                     | 0.161                |
| Other neonatal disorders                                | 1 (0.6)                       | 3 (0.7)                      | 0 (0)                         | 2 (0.4)                      | 1 (0.6)                       | 14 (3.1)                     | 0.080                |
| Other neurological disorders                            | 3 (1.7)                       | 4 (0.9)                      | 0 (0)                         | 0 (0)                        | 4 (2.3)                       | 10 (2.2)                     | 1                    |
| Other endocrine, metabolic, blood, and immune disorders | 1 (0.6)                       | 4 (0.9)                      | 0 (0)                         | 3 (0.7)                      | 2 (1.1)                       | 9 (2.0)                      | 0.736                |
| Poisoning                                               | 2 (1.1)                       | 2 (0.4)                      | 1 (0.6)                       | 3 (0.7)                      | 3 (1.7)                       | 6 (1.3)                      | 0.714                |
| Tuberculosis                                            | 0 (0)                         | 5 (1.1)                      | 0 (0)                         | 5 (1.1)                      | 0 (0)                         | 9 (2.0)                      | 0.068                |
| Liver Disease                                           | 3 (1.7)                       | 2 (0.4)                      | 1 (0.6)                       | 4 (0.9)                      | 3 (1.7)                       | 9 (2.0)                      | 1                    |
| Congenital infection                                    | 0 (0)                         | 5 (1.1)                      | 0 (0)                         | 0 (0)                        | 0 (0)                         | 7 (1.5)                      | 0.199                |
| Other skin and subcutaneous diseases                    | 1 (0.6)                       | 2 (0.4)                      | 0 (0)                         | 1 (0.2)                      | 2 (1.1)                       | 5 (1.1)                      | 1                    |
| Heart Diseases                                          | 0 (0.0)                       | 2 (0.4)                      | 0 (0)                         | 3 (0.7)                      | 0 (0)                         | 6 (1.3)                      | 0.194                |
| Cancer                                                  | 2 (1.1)                       | 3 (0.7)                      | 0 (0)                         | 1 (0.2)                      | 2 (1.1)                       | 3 (0.7)                      | 0.622                |
| Paralytic ileus and intestinal obstruction              | 0 (0)                         | 3 (0.7)                      | 0 (0)                         | 0 (0)                        | 0 (0)                         | 5 (1.1)                      | 0.329                |
| Sudden infant death syndrome                            | 5 (2.8)                       | 0 (0)                        | 0 (0)                         | 0 (0)                        | 5 (2.8)                       | 0 (0)                        | 0.002                |
| Epilepsy                                                | 0 (0)                         | 2 (0.4)                      | 2 (1.1)                       | 0 (0)                        | 2 (1.1)                       | 2 (0.4)                      | 0.310                |
| Kidney Disease                                          | 0 (0)                         | 0 (0)                        | 0 (0)                         | 0 (0)                        | 0 (0)                         | 4 (0.9)                      | 0.580                |

|                                                                    |         |         |         |         |         |         |       |
|--------------------------------------------------------------------|---------|---------|---------|---------|---------|---------|-------|
| <b>Measles</b>                                                     | 2 (1.1) | 1 (0.2) | 0 (0)   | 0 (0)   | 3 (1.7) | 1 (0.2) | 0.068 |
| <b>Neonatal sepsis</b>                                             | 0 (0)   | 1 (0.2) | 1 (0.6) | 2 (0.4) | 1 (0.6) | 3 (0.7) | 0.356 |
| <b>Other disorders of fluid, electrolyte and acid-base balance</b> | 0 (0)   | 0 (0)   | 0 (0)   | 2 (0.4) | 0 (0)   | 4 (0.9) | 0.580 |
| <b>Other immunodeficiencies</b>                                    | 0 (0)   | 1 (0.2) | 0 (0)   | 0 (0)   | 2 (1.1) | 2 (0.4) | 0.310 |
| <b>Sickle cell disorders</b>                                       | 2 (1.1) | 0 (0)   | 1 (0.6) | 0 (0)   | 2 (1.1) | 2 (0.4) | 0.310 |
| <b>Upper respiratory infections</b>                                | 0 (0)   | 1 (0.2) | 0 (0)   | 1 (0.2) | 0 (0)   | 3 (0.7) | 0.564 |
| <b>Neonatal encephalopathy</b>                                     | 0 (0)   | 1 (0.2) | 0 (0)   | 0 (0)   | 0 (0)   | 2 (0.4) | 1     |
| <b>Diabetes</b>                                                    | 0 (0)   | 1 (0.2) | 0 (0)   | 1 (0.2) | 0 (0)   | 1 (0.2) | 1     |
| <b>Motor neuron disease</b>                                        | 0 (0)   | 1 (0.2) | 0 (0)   | 0 (0)   | 0 (0)   | 1 (0.2) | 1     |
| <b>Other gastrointestinal disease</b>                              | 0 (0)   | 0 (0)   | 0 (0)   | 0 (0)   | 0 (0)   | 1 (0.2) | 1     |
| <b>Perinatal asphyxia/hypoxia</b>                                  | 0 (0)   | 1 (0.2) | 0 (0)   | 0 (0)   | 0 (0)   | 1 (0.2) | 1     |
| <b>Rabies</b>                                                      | 0 (0)   | 1 (0.2) | 0 (0)   | 0 (0)   | 0 (0)   | 1 (0.2) | 1     |

<sup>a</sup> All includes underlying, immediate, and comorbid/intermediate causes of death.

<sup>b</sup> p-values from Fisher's exact test (for the comparison of community vs. facility deaths in all cases).

**eTable 7.** Disease events caused by a given pathogen. Disease-pathogen pairs are sorted by counts (number of occurrences). The first batch of disease-pathogen pairs corresponds to underlying causes. The second batch corresponds to immediate causes.

| Stage      | Disease                      | Pathogen                          | Counts |
|------------|------------------------------|-----------------------------------|--------|
| Underlying | HIV                          | Human Immunodeficiency Virus      | 72     |
| Underlying | Malaria                      | Plasmodium falciparum             | 70     |
| Underlying | Lower respiratory infections | Streptococcus pneumoniae          | 20     |
| Underlying | Sepsis                       | Klebsiella pneumoniae             | 12     |
| Underlying | Diarrheal Diseases           | Escherichia coli                  | 11     |
| Underlying | Lower respiratory infections | Klebsiella pneumoniae             | 10     |
| Underlying | Sepsis                       | Other                             | 9      |
| Underlying | Diarrheal Diseases           | Other                             | 8      |
| Underlying | Lower respiratory infections | Haemophilus influenzae            | 7      |
| Underlying | Lower respiratory infections | Other                             | 6      |
| Underlying | Sepsis                       | Streptococcus pneumoniae          | 5      |
| Underlying | Other                        | Mycobacterium tuberculosis        | 5      |
| Underlying | Lower respiratory infections | Respiratory syncytial virus (RSV) | 5      |
| Underlying | HIV                          | Pneumocystis jirovecii            | 5      |
| Underlying | Lower respiratory infections | Cytomegalovirus                   | 4      |
| Underlying | Diarrheal Diseases           | Rotavirus non-typable             | 4      |
| Underlying | Other                        | Cytomegalovirus                   | 4      |
| Underlying | Lower respiratory infections | Adenovirus                        | 4      |
| Underlying | Lower respiratory infections | Staphylococcus aureus             | 4      |
| Underlying | Lower respiratory infections | Bordetella pertussis              | 4      |
| Underlying | Diarrheal Diseases           | Adenovirus                        | 4      |
| Underlying | Other                        | Measles morbillivirus             | 3      |
| Underlying | Sepsis                       | Cytomegalovirus                   | 3      |
| Underlying | Diarrheal Diseases           | Rotavirus A                       | 3      |
| Underlying | Lower respiratory infections | Human metapneumovirus             | 3      |
| Underlying | Other                        | Other                             | 3      |



|            |                              |                                |    |
|------------|------------------------------|--------------------------------|----|
| Underlying | Other                        | Streptococcus pneumoniae       | 3  |
| Underlying | Lower respiratory infections | Rhinovirus                     | 2  |
| Underlying | Sepsis                       | Salmonella spp.                | 2  |
| Underlying | Lower respiratory infections | Pneumocystis jirovecii         | 2  |
| Underlying | Sepsis                       | Streptococcus spp.             | 2  |
| Underlying | Malaria                      | Other                          | 2  |
| Underlying | Lower respiratory infections | Influenza B Virus              | 2  |
| Underlying | Diarrheal Diseases           | Enterovirus                    | 2  |
| Underlying | Other                        | Klebsiella pneumoniae          | 2  |
| Underlying | Sepsis                       | Escherichia coli/Shigella spp. | 1  |
| Underlying | Diarrheal Diseases           | Salmonella spp.                | 1  |
| Underlying | Other                        | Human Immunodeficiency Virus   | 1  |
| Underlying | Sepsis                       | Moraxella catarrhalis          | 1  |
| Underlying | Sepsis                       | Adenovirus                     | 1  |
| Underlying | Lower respiratory infections | Influenza A Virus              | 1  |
| Underlying | Sepsis                       | Staphylococcus aureus          | 1  |
| Underlying | Other                        | Escherichia coli/Shigella spp. | 1  |
| Underlying | Lower respiratory infections | Moraxella catarrhalis          | 1  |
| Underlying | Sepsis                       | Haemophilus influenzae         | 1  |
| Immediate  | Sepsis                       | Klebsiella pneumoniae          | 71 |
| Immediate  | Lower respiratory infections | Streptococcus pneumoniae       | 40 |
| Immediate  | Sepsis                       | Streptococcus pneumoniae       | 36 |
| Immediate  | Lower respiratory infections | Klebsiella pneumoniae          | 34 |
| Immediate  | Sepsis                       | Escherichia coli               | 28 |
| Immediate  | Lower respiratory infections | Other                          | 27 |
| Immediate  | Malaria                      | Plasmodium falciparum          | 24 |
| Immediate  | Sepsis                       | Acinetobacter baumannii        | 18 |
| Immediate  | Sepsis                       | Staphylococcus aureus          | 18 |
| Immediate  | Lower respiratory infections | Cytomegalovirus                | 18 |
| Immediate  | Sepsis                       | Other                          | 15 |

|           |                              |                                   |    |
|-----------|------------------------------|-----------------------------------|----|
| Immediate | Sepsis                       | Pseudomonas aeruginosa            | 15 |
| Immediate | Lower respiratory infections | Staphylococcus aureus             | 13 |
| Immediate | Sepsis                       | Haemophilus influenzae            | 12 |
| Immediate | Lower respiratory infections | Haemophilus influenzae            | 12 |
| Immediate | Lower respiratory infections | Respiratory syncytial virus (RSV) | 11 |
| Immediate | Sepsis                       | Candida albicans                  | 9  |
| Immediate | Lower respiratory infections | Pneumocystis jirovecii            | 8  |
| Immediate | Lower respiratory infections | Adenovirus                        | 7  |
| Immediate | Lower respiratory infections | Parainfluenza virus type 3        | 7  |
| Immediate | Sepsis                       | Cytomegalovirus                   | 7  |
| Immediate | Diarrheal Diseases           | Other                             | 6  |
| Immediate | Lower respiratory infections | Pseudomonas aeruginosa            | 6  |
| Immediate | Lower respiratory infections | Escherichia coli                  | 6  |
| Immediate | Lower respiratory infections | Influenza A Virus                 | 6  |
| Immediate | Meningitis/Encephalitis      | Klebsiella pneumoniae             | 6  |
| Immediate | Lower respiratory infections | Acinetobacter baumannii           | 6  |
| Immediate | Sepsis                       | Candida parapsilosis              | 5  |
| Immediate | Sepsis                       | Streptococcus spp.                | 4  |
| Immediate | Other                        | Other                             | 4  |
| Immediate | Meningitis/Encephalitis      | Streptococcus pneumoniae          | 4  |
| Immediate | Sepsis                       | Salmonella spp.                   | 4  |
| Immediate | Sepsis                       | Escherichia coli/Shigella spp.    | 4  |
| Immediate | Meningitis/Encephalitis      | Other                             | 3  |
| Immediate | Diarrheal Diseases           | Escherichia coli                  | 3  |
| Immediate | Sepsis                       | Enterococcus faecalis             | 3  |
| Immediate | Sepsis                       | Streptococcus pyogenes            | 3  |
| Immediate | Lower respiratory infections | Candida albicans                  | 3  |
| Immediate | Lower respiratory infections | Streptococcus spp.                | 3  |
| Immediate | Lower respiratory infections | Rhinovirus                        | 3  |
| Immediate | Sepsis                       | Enterobacter cloacae              | 3  |

|           |                              |                                |   |
|-----------|------------------------------|--------------------------------|---|
| Immediate | Other                        | Klebsiella pneumoniae          | 2 |
| Immediate | Sepsis                       | Adenovirus                     | 2 |
| Immediate | Sepsis                       | Streptococcus species          | 2 |
| Immediate | Sepsis                       | Enterococcus faecium           | 2 |
| Immediate | Diarrheal Diseases           | Enterococcus faecium           | 1 |
| Immediate | Diarrheal Diseases           | Adenovirus                     | 1 |
| Immediate | Lower respiratory infections | Salmonella spp.                | 1 |
| Immediate | Malaria                      | Parainfluenza virus type 3     | 1 |
| Immediate | Diarrheal Diseases           | Escherichia coli/Shigella spp. | 1 |
| Immediate | Meningitis/Encephalitis      | Streptococcus pyogenes         | 1 |
| Immediate | Diarrheal Diseases           | Enterococcus faecalis          | 1 |
| Immediate | Other                        | Escherichia coli               | 1 |
| Immediate | Meningitis/Encephalitis      | Cytomegalovirus                | 1 |
| Immediate | Meningitis/Encephalitis      | Streptococcus spp.             | 1 |
| Immediate | Meningitis/Encephalitis      | Haemophilus influenzae         | 1 |
| Immediate | Lower respiratory infections | Streptococcus species          | 1 |
| Immediate | Meningitis/Encephalitis      | Acinetobacter baumannii        | 1 |
| Immediate | Meningitis/Encephalitis      | Salmonella spp.                | 1 |

**eTable 8.** Number of times pathogens were determined to be in the causal chain leading to death. The list includes the 15 most frequently identified pathogens, by condition in causal chain, for deaths among children aged 1 to <59 months, for the CHAMPS Network (sites in Manhiça, Mozambique; Soweto, South Africa; Kisumu and Siaya county, Kenya; Bamako, Mali; Baliakandi, Bangladesh; Makeni, Sierra Leone; Harar and Kersa, Ethiopia), December 2016–December 2020.

| Pathogen                             | HIV<br>(N=75) | Malnutrition<br>(N=150) | Sepsis<br>(N=253) | Diarrhea/<br>Gastrointestinal<br>syndrome<br>(N=90) | Lower<br>respiratory<br>infection<br>(N=280) | Meningoencephalitis<br>syndrome or malaria<br>(N=180) | Number of deaths in<br>which the pathogen<br>was determined to<br>have<br><br>been among the<br>causes of death<br>(N=632) | Number of deaths in<br>which the pathogen<br>was the only pathogen<br>in the causal chain<br>leading to death |
|--------------------------------------|---------------|-------------------------|-------------------|-----------------------------------------------------|----------------------------------------------|-------------------------------------------------------|----------------------------------------------------------------------------------------------------------------------------|---------------------------------------------------------------------------------------------------------------|
| <i>Klebsiella pneumoniae</i>         | 17 (22.7)     | 46 (30.7)               | 117 (46.2)        | 23 (25.6)                                           | 112 (40.0)                                   | 45 (25.0)                                             | 155 (24.5)                                                                                                                 | 19 (12.3)                                                                                                     |
| <i>Plasmodium falciparum</i>         | 12 (16.0)     | 43 (28.7)               | 22 (8.7)          | 5 (5.6)                                             | 20 (7.1)                                     | 122 (67.8)                                            | 122 (19.3)                                                                                                                 | 77 (63.1)                                                                                                     |
| <i>Streptococcus pneumoniae</i>      | 16 (21.3)     | 37 (24.7)               | 62 (24.5)         | 13 (14.4)                                           | 93 (33.2)                                    | 23 (12.8)                                             | 109 (17.2)                                                                                                                 | 20 (18.3)                                                                                                     |
| HIV                                  | 75 (100)      | 11 (7.3)                | 31 (12.3)         | 12 (13.3)                                           | 45 (16.1)                                    | 17 (9.4)                                              | 75 (11.9)                                                                                                                  | 7 (9.3)                                                                                                       |
| <i>Escherichia coli</i>              | 6 (8.0)       | 24 (16.0)               | 42 (16.6)         | 23 (25.6)                                           | 27 (9.6)                                     | 15 (8.3)                                              | 58 (9.2)                                                                                                                   | 11 (19.0)                                                                                                     |
| Cytomegalovirus (CMV)                | 20 (26.7)     | 15 (10.0)               | 33 (13.0)         | 3 (3.3)                                             | 45 (16.1)                                    | 11 (6.1)                                              | 57 (9.0)                                                                                                                   | 6 (10.5)                                                                                                      |
| <i>Haemophilus influenzae</i>        | 7 (9.3)       | 12 (8.0)                | 29 (18.3)         | 6 (6.7)                                             | 38 (13.6)                                    | 11 (6.1)                                              | 46 (7.3)                                                                                                                   | 3 (7.3)                                                                                                       |
| <i>Acinetobacter baumannii</i>       | 0 (0)         | 5 (3.3)                 | 35 (13.8)         | 2 (2.2)                                             | 26 (9.3)                                     | 11 (6.1)                                              | 41 (6.5)                                                                                                                   | 1 (2.6)                                                                                                       |
| <i>Staphylococcus aureus</i>         | 5 (6.7)       | 7 (4.7)                 | 31 (12.3)         | 1 (1.1)                                             | 36 (12.9)                                    | 5 (2.8)                                               | 39 (6.2)                                                                                                                   | 8 (18.6)                                                                                                      |
| Adenovirus                           | 7 (9.3)       | 4 (2.7)                 | 9 (3.6)           | 11 (12.2)                                           | 16 (5.7)                                     | 5 (2.8)                                               | 27 (4.3)                                                                                                                   | 7 (25.9)                                                                                                      |
| <i>Pseudomonas aeruginosa</i>        | 6 (8.0)       | 6 (4.0)                 | 21 (8.3)          | 3 (3.3)                                             | 19 (6.8)                                     | 7 (3.9)                                               | 26 (4.1)                                                                                                                   | 1 (3.8)                                                                                                       |
| <i>Pneumocystis jirovecii</i>        | 12 (16.0)     | 5 (3.3)                 | 11 (4.3)          | 3 (3.3)                                             | 17 (6.1)                                     | 4 (2.2)                                               | 22 (3.5)                                                                                                                   | 2 (9.1)                                                                                                       |
| Respiratory syncytial virus<br>(RSV) | 3 (4.0)       | 1 (0.7)                 | 6 (2.4)           | 1 (1.1)                                             | 20 (7.1)                                     | 2 (1.1)                                               | 21 (3.3)                                                                                                                   | 3 (14.3)                                                                                                      |
| <i>Candida albicans</i>              | 2 (2.7)       | 3 (2.0)                 | 11 (4.3)          | 4 (4.4)                                             | 11 (3.9)                                     | 3 (1.7)                                               | 13 (2.1)                                                                                                                   | 0 (0)                                                                                                         |
| <i>Salmonella spp.</i>               | 1 (1.3)       | 6 (4.0)                 | 10 (4.0)          | 3 (3.3)                                             | 5 (1.8)                                      | 7 (3.9)                                               | 12 (1.9)                                                                                                                   | 5 (38.5)                                                                                                      |

**eTable 9:** Preventability of studied deaths according to the Decode panel, stratified by age groups and place of death.

|                                                 | <b>Total<br/>(n=632)<br/>N (%)</b> | <b>Infant (28 days to<br/>&lt;12 months)<br/>(N=331)<br/>N (%)</b> | <b>Child (12 months to<br/>&lt;60 Months)<br/>(N=301)<br/>N (%)</b> | <b>Community<br/>death (N=176)<br/>N (%)</b> | <b>In-hospital<br/>death (N=456)<br/>N (%)</b> |
|-------------------------------------------------|------------------------------------|--------------------------------------------------------------------|---------------------------------------------------------------------|----------------------------------------------|------------------------------------------------|
| <b>Preventable</b>                              | 494 (78.2)                         | 250 (75.5)                                                         | 244 (81.1)                                                          | 131 (74.4)                                   | 363 (79.6)                                     |
| <b>Preventable under certain<br/>conditions</b> | 26 (4.1)                           | 18 (5.4)                                                           | 8 (2.7)                                                             | 12 (6.8)                                     | 14 (3.1)                                       |
| <b>Not preventable</b>                          | 98 (15.5)                          | 53 (16.0)                                                          | 45 (14.9)                                                           | 25 (14.2)                                    | 73 (16.0)                                      |
| <b>No consensus/ Not reported</b>               | 14 (2.2)                           | 10 (3.1)                                                           | 4 (1.3)                                                             | 8 (4.6)                                      | 6 (1.3)                                        |
