# Supplementary material for: Causes of Death Among Infants and Children in the Child Health and Mortality Prevention Surveillance (CHAMPS) Network
Source: PubMed Central journal article supplement (PMC10372710; doi:10.1001/jamanetworkopen.2023.22494), 2023-07-26
Supplement: jamanetwopen-e2322494-s002.pdf [file jamanetwopen-e2322494-s002.pdf]

**\*Group Name(s): Child Health and Mortality Prevention Surveillance (CHAMPS) Network**

| <b>*First Name and Middle Initial(s)</b> | <b>*Last Name</b> | <b>*Suffix (eg, Jr, III)</b> | <b>Academic Degrees</b> | <b>Institution</b>                                                                            | <b>Location (city, state/province, country)</b> | <b>Role or Contribution, eg, chair, principal investigator</b> | <b>Group (if more than 1 Group listed in the byline) and/or Subgroup (eg, Steering Committee)</b> |
|------------------------------------------|-------------------|------------------------------|-------------------------|-----------------------------------------------------------------------------------------------|-------------------------------------------------|----------------------------------------------------------------|---------------------------------------------------------------------------------------------------|
| Ferdousi                                 | Begum             |                              | MD                      | Bangabandhu Sheikh Mujib Medical University (BSMMU)                                           | Bangladesh                                      | Data collection                                                |                                                                                                   |
| Mohammad Mosiur                          | Rahman            |                              | MD                      | Bangabandhu Sheikh Mujib Medical University, Dhaka, Bangladesh                                | Bangladesh                                      | Data collection                                                |                                                                                                   |
| Mohammed                                 | Kamal             |                              | PhD                     | Bangabandhu Sheikh Mujib Medical University, Dhaka, Bangladesh                                | Bangladesh                                      | Data collection                                                |                                                                                                   |
| A.S.M. Nawshad Uddin                     | Ahmed             |                              | FCPS                    | Bangladesh Institute of Child Health at Dhaka University and Dhaka Shishu Children's Hospital | Bangladesh                                      | Data collection                                                |                                                                                                   |
| Mahbubul                                 | Hoque             |                              | FCPS                    | Bangladesh Institute of Child Health at Dhaka University and Dhaka Shishu Children's Hospital | Bangladesh                                      | Data collection                                                |                                                                                                   |
| Md. Atique Iqbal                         | Chowdhury         |                              |                         | International Centre for Diarrhoeal Disease Research, Bangladesh (icddr,b)                    | Bangladesh                                      | Data collection                                                |                                                                                                   |
| Saria                                    | Tasnim            |                              | FCPS                    | Dhaka Community Medical College and Hospital                                                  | Bangladesh                                      | Data collection                                                |                                                                                                   |
| Mahbubur                                 | Rahman            |                              | MPH                     | Institute of Epidemiology, Disease Control and Research (IEDCR)                               | Bangladesh                                      | Data collection                                                |                                                                                                   |
| Tahmina                                  | Shirin            |                              | PhD                     | Institute of Epidemiology, Disease Control and Research (IEDCR)                               | Bangladesh                                      | Data collection                                                |                                                                                                   |
| Meerjady Sabrina                         | Flora             |                              | PhD                     | Institute of Epidemiology, Disease Control, and Research (IEDCR), Dhaka, Bangladesh           | Bangladesh                                      | Data collection                                                |                                                                                                   |

| <b>*First Name and Middle Initial(s)</b> | <b>*Last Name</b> | <b>*Suffix (eg, Jr, III)</b> | <b>Academic Degrees</b> | <b>Institution</b>                                                                                                     | <b>Location (city, state/province, country)</b> | <b>Role or Contribution, eg, chair, principal investigator</b> | <b>Group (if more than 1 Group listed in the byline) and/or Subgroup (eg, Steering Committee)</b> |
|------------------------------------------|-------------------|------------------------------|-------------------------|------------------------------------------------------------------------------------------------------------------------|-------------------------------------------------|----------------------------------------------------------------|---------------------------------------------------------------------------------------------------|
| Dilruba                                  | Ahmed             |                              | PhD                     | International Centre for Diarrhoeal Disease Research, Bangladesh (icddr,b)                                             | Bangladesh                                      | Data collection                                                |                                                                                                   |
| K.                                       | Zaman             |                              | PhD                     | International Centre for Diarrhoeal Disease Research, Bangladesh (icddr,b)                                             | Bangladesh                                      | Data collection                                                |                                                                                                   |
| Mohammed Sabbir                          | Ahmed             |                              | MPH                     | International Centre for Diarrhoeal Disease Research, Bangladesh (icddr,b)                                             | Bangladesh                                      | Data collection                                                |                                                                                                   |
| Mohammed Zahid                           | Hossain           |                              | PhD                     | International Centre for Diarrhoeal Disease Research, Bangladesh (icddr,b)                                             | Bangladesh                                      | Data collection                                                |                                                                                                   |
| Mustafizur                               | Rahman            |                              | PhD                     | International Centre for Diarrhoeal Disease Research, Bangladesh (icddr,b)                                             | Bangladesh                                      | Data collection                                                |                                                                                                   |
| Shahana                                  | Parveen           |                              |                         | International Centre for Diarrhoeal Disease Research, Bangladesh (icddr,b)                                             | Bangladesh                                      | Data collection                                                |                                                                                                   |
| Sanwarul                                 | Bari              |                              | MD                      | Maternal and Child Health Division, International Center for Diarrhoeal Diseases Research (icddr,b), Dhaka, Bangladesh | Bangladesh                                      | Data collection                                                |                                                                                                   |
| Qazi Sadek-ur                            | Rahman            |                              | FCPS                    | International Centre for Diarrhoeal Disease Research, Bangladesh (icddr,b)                                             | Bangladesh                                      | Data collection                                                |                                                                                                   |
| Ferdousi                                 | Islam             |                              | FCPS                    | Popular Medical College and Hospital in Dhaka, Bangladesh                                                              | Bangladesh                                      | Data collection                                                |                                                                                                   |

| <b>*First Name and Middle Initial(s)</b> | <b>*Last Name</b> | <b>*Suffix (eg, Jr, III)</b> | <b>Academic Degrees</b> | <b>Institution</b>                                    | <b>Location (city, state/province, country)</b> | <b>Role or Contribution, eg, chair, principal investigator</b> | <b>Group (if more than 1 Group listed in the byline) and/or Subgroup (eg, Steering Committee)</b> |
|------------------------------------------|-------------------|------------------------------|-------------------------|-------------------------------------------------------|-------------------------------------------------|----------------------------------------------------------------|---------------------------------------------------------------------------------------------------|
| Gutunduru                                | Revathi           |                              | MD                      | Aga Khan University Hospital, Nairobi, Kenya          | Kenya                                           | Data collection                                                |                                                                                                   |
| Aggrey K.                                | Igunza            |                              |                         | Kenya Medical Research Institute, Kisumu              | Kenya                                           | Data collection                                                |                                                                                                   |
| Magdalene                                | Kuria             |                              | MMED                    | Kisumu County Department of Health                    | Kenya                                           | Data collection                                                |                                                                                                   |
| Paul K.                                  | Mitei             |                              | MMED                    | Kisumu County Department of Health                    | Kenya                                           | Data collection                                                |                                                                                                   |
| Florence                                 | Murila            |                              | MMED                    | University of Nairobi                                 | Kenya                                           | Data collection                                                |                                                                                                   |
| Jennifer K.                              | Verani            |                              | MD                      | CDC Atlanta                                           | U.S.A.                                          | Data collection                                                |                                                                                                   |
| Mugah A.                                 | Christopher       |                              |                         | Kenya Medical Research Institute, Kisumu              | Kenya                                           | Data collection                                                |                                                                                                   |
| Janet                                    | Agaya             |                              |                         | Kenya Medical Research Institute, Kisumu              | Kenya                                           | Data collection                                                |                                                                                                   |
| Harun O.                                 | Owuor             |                              |                         | Kenya Medical Research Institute, Kisumu              | Kenya                                           | Data collection                                                |                                                                                                   |
| Gregory O.                               | Sadat             |                              |                         | Kenya Medical Research Institute, Kisumu              | Kenya                                           | Data collection                                                |                                                                                                   |
| Joy                                      | Kuboka            |                              |                         | US Centers for Disease Control and Prevention, Kisumu | Kenya                                           | Data collection                                                |                                                                                                   |
| Kephas                                   | Otieno            |                              |                         | Kenya Medical Research Institute, Kisumu              | Kenya                                           | Data collection                                                |                                                                                                   |
| Richard                                  | Oliech            |                              |                         | Kenya Medical Research Institute, Kisumu              | Kenya                                           | Data collection                                                |                                                                                                   |

| <b>*First Name and Middle Initial(s)</b> | <b>*Last Name</b> | <b>*Suffix (eg, Jr, III)</b> | <b>Academic Degrees</b> | <b>Institution</b>                                               | <b>Location (city, state/province, country)</b> | <b>Role or Contribution, eg, chair, principal investigator</b> | <b>Group (if more than 1 Group listed in the byline) and/or Subgroup (eg, Steering Committee)</b> |
|------------------------------------------|-------------------|------------------------------|-------------------------|------------------------------------------------------------------|-------------------------------------------------|----------------------------------------------------------------|---------------------------------------------------------------------------------------------------|
| Peter O.                                 | Nyamthimba        |                              |                         | Kenya Medical Research Institute, Kisumu                         | Kenya                                           | Data collection                                                |                                                                                                   |
| Aluoch                                   | Anne              |                              |                         | Kenya Medical Research Institute, Kisumu                         | Kenya                                           | Data collection                                                |                                                                                                   |
| Peter O.                                 | Otieno            |                              |                         | Kenya Medical Research Institute, Kisumu                         | Kenya                                           | Data collection                                                |                                                                                                   |
| Dickson                                  | Gethi             |                              |                         | Kenya Medical Research Institute, Kisumu                         | Kenya                                           | Data collection                                                |                                                                                                   |
| Sammy                                    | Khagayi           |                              |                         | Kenya Medical Research Institute, Kisumu                         | Kenya                                           | Data collection                                                |                                                                                                   |
| Joyce Were                               | Akinyi            |                              |                         | Kenya Medical Research Institute, Kisumu                         | Kenya                                           | Data collection                                                |                                                                                                   |
| Anne                                     | Ogollo            |                              |                         | Kenya Medical Research Institute, Kisumu                         | Kenya                                           | Data collection                                                |                                                                                                   |
| Thomas                                   | Misore            |                              |                         | Kenya Medical Research Institute, Kisumu                         | Kenya                                           | Data collection                                                |                                                                                                   |
| George                                   | Aol               |                              |                         | Kenya Medical Research Institute, Kisumu                         | Kenya                                           | Data collection                                                |                                                                                                   |
| David                                    | Obor              |                              |                         | Kenya Medical Research Institute, Kisumu                         | Kenya                                           | Data collection                                                |                                                                                                   |
| Maryanne                                 | Nyanjom           |                              |                         | Kenya Medical Research Institute, Kisumu                         | Kenya                                           | Data collection                                                |                                                                                                   |
| Mary                                     | Omwalo            |                              |                         | Kenya Medical Research Institute, Kisumu                         | Kenya                                           | Data collection                                                |                                                                                                   |
| Frederick                                | Omondi            |                              |                         | Henry Jackson Foundation Medical Research International (HJFMRI) | Kenya                                           | Data collection                                                |                                                                                                   |

| <b>*First Name and Middle Initial(s)</b> | <b>*Last Name</b> | <b>*Suffix (eg, Jr, III)</b> | <b>Academic Degrees</b> | <b>Institution</b>                                                                      | <b>Location (city, state/province, country)</b> | <b>Role or Contribution, eg, chair, principal investigator</b> | <b>Group (if more than 1 Group listed in the byline) and/or Subgroup (eg, Steering Committee)</b> |
|------------------------------------------|-------------------|------------------------------|-------------------------|-----------------------------------------------------------------------------------------|-------------------------------------------------|----------------------------------------------------------------|---------------------------------------------------------------------------------------------------|
| Were Zacchaeus                           | Abaja             |                              |                         | Kenya Medical Research Institute, Kisumu                                                | Kenya                                           | Data collection                                                |                                                                                                   |
| Doh                                      | Sanogo            |                              |                         | Centre pour le Développement des Vaccins (CVD-Mali)                                     | Mali                                            | Data collection                                                |                                                                                                   |
| Nana                                     | Kourouma          |                              |                         | Centre pour le Développement des Vaccins (CVD-Mali)                                     | Mali                                            | Data collection                                                |                                                                                                   |
| Seydou                                   | Sissoko           |                              |                         | Centre pour le Développement des Vaccins (CVD-Mali)                                     | Mali                                            | Data collection                                                |                                                                                                   |
| Uma U.                                   | Onwuchekwu        |                              |                         | Centre pour le Développement des Vaccins (CVD-Mali)                                     | Mali                                            | Data collection                                                |                                                                                                   |
| Diakaridia                               | Sidibe            |                              |                         | Centre pour le Développement des Vaccins (CVD-Mali), Ministère de la Santé              | Mali                                            | Data collection                                                |                                                                                                   |
| Tatiana                                  | Keita             |                              | MD                      | Clinique Pasteur, Bamako, Mali                                                          | Mali                                            | Data collection                                                |                                                                                                   |
| Diakaridia                               | Kone              |                              |                         | CSRef Commune I, Bamako, Mali                                                           | Mali                                            | Data collection                                                |                                                                                                   |
| Cheick Bougadari                         | Traore            |                              |                         | Department of pathological Anatlmy and Citology, University Hospital of Point G, Bamako | Mali                                            | Data collection                                                |                                                                                                   |
| Jane                                     | Juma              |                              |                         | Centre pour le Développement des Vaccins (CVD-Mali)                                     | Mali                                            | Data collection                                                |                                                                                                   |
| Kounandji                                | Diarra            |                              |                         | Centre pour le Développement des Vaccins (CVD-Mali)                                     | Mali                                            | Data collection                                                |                                                                                                   |
| Awa                                      | Traore            |                              |                         | Centre pour le Développement des Vaccins (CVD-Mali)                                     | Mali                                            | Data collection                                                |                                                                                                   |

| <b>*First Name and Middle Initial(s)</b> | <b>*Last Name</b> | <b>*Suffix (eg, Jr, III)</b> | <b>Academic Degrees</b> | <b>Institution</b>                                                                   | <b>Location (city, state/province, country)</b> | <b>Role or Contribution, eg, chair, principal investigator</b> | <b>Group (if more than 1 Group listed in the byline) and/or Subgroup (eg, Steering Committee)</b> |
|------------------------------------------|-------------------|------------------------------|-------------------------|--------------------------------------------------------------------------------------|-------------------------------------------------|----------------------------------------------------------------|---------------------------------------------------------------------------------------------------|
| Tiéman                                   | Diarra            |                              |                         | Point Sud, Center for Research on Local Knowledge, Bamako                            | Mali                                            | Data collection                                                |                                                                                                   |
| Kiranpreet                               | Chawla            |                              |                         | University of Maryland School of Medicine, Baltimore, Maryland, USA                  | U.S.A.                                          | Data collection                                                |                                                                                                   |
| Sharon M.                                | Tennant           |                              | PhD                     | University of Maryland School of Medicine, Baltimore, Maryland, USA                  | U.S.A.                                          | Data collection                                                |                                                                                                   |
| Carol L.                                 | Greene            |                              | MD                      | University of Maryland School of Medicine, Baltimore, Maryland, USA                  | U.S.A.                                          | Data collection                                                |                                                                                                   |
| J. Kristie                               | Johnson           |                              | PhD                     | University of Maryland School of Medicine, Baltimore, Maryland, USA                  | U.S.A.                                          | Data collection                                                |                                                                                                   |
| Rima                                     | Koka              |                              | MD                      | University of Maryland School of Medicine, Baltimore, Maryland, USA                  | U.S.A.                                          | Data collection                                                |                                                                                                   |
| Karen D.                                 | Fairchild         |                              | MD                      | University of Virginia                                                               | U.S.A.                                          | Data collection                                                |                                                                                                   |
| Sandra                                   | Lako              |                              | MPH                     | Aberdeen Women’s Centre in Freetown                                                  | Sierra Leone                                    | Data collection                                                |                                                                                                   |
| Amara                                    | Jambai            |                              |                         | Ministry of Health and Sanitation, Freetown                                          | Sierra Leone                                    | Data collection                                                |                                                                                                   |
| Sartie                                   | Kenneh            |                              |                         | Ministry of Health and Sanitation, Freetown                                          | Sierra Leone                                    | Data collection                                                |                                                                                                   |
| Tom                                      | Sesay             |                              |                         | Ministry of Health and Sanitation, Freetown                                          | Sierra Leone                                    | Data collection                                                |                                                                                                   |
| Joseph                                   | Bangura           |                              |                         | District Health Management Team, Ministry of Health and Sanitation, Bombali District | Sierra Leone                                    | Data collection                                                |                                                                                                   |
| Babatunde                                | Duduyemi          |                              |                         | University of Sierra leone teaching hospital Complex, Freetown                       | Sierra Leone                                    | Data collection                                                |                                                                                                   |

| <b>*First Name and Middle Initial(s)</b> | <b>*Last Name</b> | <b>*Suffix (eg, Jr, III)</b> | Academic Degrees | Institution                                                                                        | Location (city, state/province, country) | Role or Contribution, eg, chair, principal investigator | Group (if more than 1 Group listed in the byline) and/or Subgroup (eg, Steering Committee) |
|------------------------------------------|-------------------|------------------------------|------------------|----------------------------------------------------------------------------------------------------|------------------------------------------|---------------------------------------------------------|--------------------------------------------------------------------------------------------|
| Princewill Phillip                       | Nwajiobi          |                              |                  | National Hospital, Abuja                                                                           | Nigeria                                  | Data collection                                         |                                                                                            |
| Foday                                    | Sessay            |                              |                  | District Health Management Team, Ministry of Health and Sanitation, Bombali District               | Sierra Leone                             | Data collection                                         |                                                                                            |
| Martha                                   | Senessie          |                              |                  | Makeni Regional Hospital, Bombali District                                                         | Sierra Leone                             | Data collection                                         |                                                                                            |
| Chuka                                    | Oham              |                              |                  | Makeni Regional Hospital, Bombali District                                                         | Sierra Leone                             | Data collection                                         |                                                                                            |
| Ibrahim                                  | Bangura           |                              |                  | Makeni Regional Hospital, Bombali District                                                         | Sierra Leone                             | Data collection                                         |                                                                                            |
| Abdulai Othman                           | Bah               |                              |                  | Focus 1000                                                                                         | Sierra Leone                             | Data collection                                         |                                                                                            |
| Alim                                     | Swaray-Deen       |                              |                  | University of Ghana Medical School                                                                 | Ghana                                    | Data collection                                         |                                                                                            |
| Ronita                                   | Luke              |                              |                  | Ministry of Health and Sanitation, Freetown                                                        | Sierra Leone                             | Data collection                                         |                                                                                            |
| Okokon                                   | Ita               |                              |                  | University of Calabar teaching Hospital                                                            | Nigeria                                  | Data collection                                         |                                                                                            |
| Cornell                                  | Chukwuegbo        |                              |                  | Federal medical Center/PathConsult Diagnostics Ltd., Umuahia                                       | Nigeria                                  | Data collection                                         |                                                                                            |
| Sulaiman                                 | Sannoh            |                              |                  | Division of Neonatology, Department of Pediatrics, St. Luke's University Health Network, Easton PA | U.S.A.                                   | Data collection                                         |                                                                                            |

| <b>*First Name and Middle Initial(s)</b> | <b>*Last Name</b> | <b>*Suffix (eg, Jr, III)</b> | Academic Degrees | Institution                                                                                                                                                                                                                                       | Location (city, state/province, country) | Role or Contribution, eg, chair, principal investigator | Group (if more than 1 Group listed in the byline) and/or Subgroup (eg, Steering Committee) |
|------------------------------------------|-------------------|------------------------------|------------------|---------------------------------------------------------------------------------------------------------------------------------------------------------------------------------------------------------------------------------------------------|------------------------------------------|---------------------------------------------------------|--------------------------------------------------------------------------------------------|
| Julius                                   | Ojulong           |                              |                  | Crown Agents                                                                                                                                                                                                                                      | Sierra Leone                             | Data collection                                         |                                                                                            |
| Carrie-Jo                                | Cain              |                              |                  | World Hope International                                                                                                                                                                                                                          | Sierra Leone                             | Data collection                                         |                                                                                            |
| James                                    | Bunn              |                              |                  | World Health Organization                                                                                                                                                                                                                         | Sierra Leone                             | Data collection                                         |                                                                                            |
| Hailemariam                              | Legesse           |                              |                  | UNICEF Country Office                                                                                                                                                                                                                             | Sierra Leone                             | Data collection                                         |                                                                                            |
| Francis                                  | Moses             |                              |                  | Ministry of Health and Sanitation, Freetown                                                                                                                                                                                                       | Sierra Leone                             | Data collection                                         |                                                                                            |
| James                                    | Squire            |                              |                  | Ministry of Health and Sanitation, Freetown                                                                                                                                                                                                       | Sierra Leone                             | Data collection                                         |                                                                                            |
| Oluseyi                                  | Balogun           |                              |                  | Crown Agents                                                                                                                                                                                                                                      | Sierra Leone                             | Data collection                                         |                                                                                            |
| Dickens                                  | Kowuor            |                              |                  | Crown Agents                                                                                                                                                                                                                                      | Sierra Leone                             | Data collection                                         |                                                                                            |
| Andrew                                   | Moseray           |                              |                  | Crown Agents                                                                                                                                                                                                                                      | Sierra Leone                             | Data collection                                         |                                                                                            |
| Khadija<br>Megan                         | Gassama<br>Bias   |                              |                  | Crown Agents<br>Infectious Diseases Pathology Branch,<br>Division of High-Consequence Pathogens<br>and Pathology, National Center for<br>emerging and Zoonotic Infectious<br>Diseases, Centers for Disease Control and<br>Prevention, Atlanta, US | Sierra Leone<br>U.S.A.                   | Data collection                                         |                                                                                            |



| <b>*First Name and Middle Initial(s)</b> | <b>*Last Name</b> | <b>*Suffix (eg, Jr, III)</b> | <b>Academic Degrees</b> | <b>Institution</b>                                                                                                                                                                                                 | <b>Location (city, state/province, country)</b> | <b>Role or Contribution, eg, chair, principal investigator</b> | <b>Group (if more than 1 Group listed in the byline) and/or Subgroup (eg, Steering Committee)</b> |
|------------------------------------------|-------------------|------------------------------|-------------------------|--------------------------------------------------------------------------------------------------------------------------------------------------------------------------------------------------------------------|-------------------------------------------------|----------------------------------------------------------------|---------------------------------------------------------------------------------------------------|
| Rebecca P.                               | Philipsborn       |                              | MD                      | Department of Pediatrics, Emory University Hospital, Atlanta, Georgia, USA                                                                                                                                         | U.S.A.                                          | Data collection                                                |                                                                                                   |
| Tais                                     | Wilson            |                              |                         | Infectious Diseases Pathology Branch, Division of High-Consequence Pathogens and Pathology, National Center for emerging and Zoonotic Infectious Diseases, Centers for Disease Control and Prevention, Atlanta, US | U.S.A.                                          | Data collection                                                |                                                                                                   |
| Navit T.                                 | Salzberg          |                              | MPH                     | Emory Global Health Institute, Emory University, Atlanta, Georgia                                                                                                                                                  | U.S.A.                                          | Data collection                                                |                                                                                                   |
| Jeffrey P.                               | Koplan            |                              | MD                      | Emory Global Health Institute, Emory University, Atlanta, Georgia                                                                                                                                                  | U.S.A.                                          | Data collection                                                |                                                                                                   |
| Josilene Nascimento                      | Seixas            |                              |                         | Infectious Diseases Pathology Branch, Division of High-Consequence Pathogens and Pathology, National Center for emerging and Zoonotic Infectious Diseases, Centers for Disease Control and Prevention, Atlanta, US | U.S.A.                                          | Data collection                                                |                                                                                                   |

| <b>*First Name and Middle Initial(s)</b> | <b>*Last Name</b> | <b>*Suffix (eg, Jr, III)</b> | <b>Academic Degrees</b> | <b>Institution</b>                                                                                                                                                                                                 | <b>Location (city, state/province, country)</b> | <b>Role or Contribution, eg, chair, principal investigator</b> | <b>Group (if more than 1 Group listed in the byline) and/or Subgroup (eg, Steering Committee)</b> |
|------------------------------------------|-------------------|------------------------------|-------------------------|--------------------------------------------------------------------------------------------------------------------------------------------------------------------------------------------------------------------|-------------------------------------------------|----------------------------------------------------------------|---------------------------------------------------------------------------------------------------|
| Jana M.                                  | Ritter            |                              | DVM                     | Infectious Diseases Pathology Branch, Division of High-Consequence Pathogens and Pathology, National Center for emerging and Zoonotic Infectious Diseases, Centers for Disease Control and Prevention, Atlanta, US | U.S.A.                                          | Data collection                                                |                                                                                                   |
| Margaret                                 | Basket            |                              |                         | Emory Global Health Institute, Emory University, Atlanta, Georgia                                                                                                                                                  | U.S.A.                                          | Data collection                                                |                                                                                                   |
| Sherif R. (deceased)                     | Zaki              |                              | MD                      | Infectious Diseases Pathology Branch, Division of High-Consequence Pathogens and Pathology, National Center for emerging and Zoonotic Infectious Diseases, Centers for Disease Control and Prevention, Atlanta, US | U.S.A.                                          | Data collection                                                |                                                                                                   |
| Ashutosh                                 | Wadhwa            |                              |                         | Center for Global Health, Centers for Disease Control and prevention, Atlanta                                                                                                                                      | U.S.A.                                          | Data collection                                                |                                                                                                   |
| Jacob                                    | Witherbee         |                              |                         | National Center for Immunization and Respiratory Diseases at the Centers for US Disease Control and Prevention                                                                                                     | U.S.A.                                          | Data collection                                                |                                                                                                   |

| <b>*First Name and Middle Initial(s)</b> | <b>*Last Name</b> | <b>*Suffix (eg, Jr, III)</b> | Academic Degrees | Institution                                                                                                                                                                                                        | Location (city, state/province, country) | Role or Contribution, eg, chair, principal investigator | Group (if more than 1 Group listed in the byline) and/or Subgroup (eg, Steering Committee) |
|------------------------------------------|-------------------|------------------------------|------------------|--------------------------------------------------------------------------------------------------------------------------------------------------------------------------------------------------------------------|------------------------------------------|---------------------------------------------------------|--------------------------------------------------------------------------------------------|
| Roosecelis                               | Martines          |                              | MD               | Infectious Diseases Pathology Branch, Division of High-Consequence Pathogens and Pathology, National Center for emerging and Zoonotic Infectious Diseases, Centers for Disease Control and Prevention, Atlanta, US | U.S.A.                                   | Data collection                                         |                                                                                            |
| Maureen                                  | Diaz              |                              |                  | Respiratory Diseases Branch, Division of Bacterial Diseases, National Center for Immunization and Respiratory Diseases, Centers for Disease Control and Prevention, Atlanta, US                                    | U.S.A.                                   | Data collection                                         |                                                                                            |
| Jessica                                  | Waller            |                              |                  | Respiratory Diseases Branch, Division of Bacterial Diseases, National Center for Immunization and Respiratory Diseases, Centers for Disease Control and Prevention, Atlanta, US                                    |                                          |                                                         |                                                                                            |
| Jonas M.                                 | Winchell          |                              | PhD              | Respiratory Diseases Branch, Division of Bacterial Diseases, National Center for Immunization and Respiratory Diseases, Centers for Disease Control and Prevention, Atlanta, US                                    | U.S.A.                                   | Data collection                                         |                                                                                            |

| <b>*First Name and Middle Initial(s)</b> | <b>*Last Name</b> | <b>*Suffix (eg, Jr, III)</b> | <b>Academic Degrees</b> | <b>Institution</b>                                                                                                                               | <b>Location (city, state/province, country)</b> | <b>Role or Contribution, eg, chair, principal investigator</b> | <b>Group (if more than 1 Group listed in the byline) and/or Subgroup (eg, Steering Committee)</b> |
|------------------------------------------|-------------------|------------------------------|-------------------------|--------------------------------------------------------------------------------------------------------------------------------------------------|-------------------------------------------------|----------------------------------------------------------------|---------------------------------------------------------------------------------------------------|
| Joseph O.                                | Oundo             |                              | PhD                     | 1) London School of Hygiene & Tropical Medicine, United Kingdom, 2) College of Health and Medical Sciences, Haramaya University, Harar, Ethiopia | Ethiopia                                        | Decode Panel                                                   |                                                                                                   |
| Fikremelekot                             | Temesgen          |                              | MD                      | Addis Ababa University                                                                                                                           | Ethiopia                                        | Decode Panel                                                   |                                                                                                   |
| Melisachew Mulatu                        | Yeshi             |                              | MD                      | Ayder Specialized Comprehensive Hospital at Mekelle University                                                                                   | Ethiopia                                        | Decode Panel                                                   |                                                                                                   |
| Addisu                                   | Alemu             |                              | MD                      | College of Health and Medical Sciences at Haramaya University                                                                                    | Ethiopia                                        | Decode Panel                                                   |                                                                                                   |
| Alexander M.                             | Ibrahim           |                              | MD                      | College of Health and Medical Sciences at Haramaya University                                                                                    | Ethiopia                                        | Decode Panel                                                   |                                                                                                   |
| Tadesse                                  | Gure              |                              | MD                      | College of Health and Medical Sciences at Haramaya University                                                                                    | Ethiopia                                        | Decode Panel                                                   |                                                                                                   |
| Stian                                    | Orlien            |                              | PhD                     | University of Hargeisam Somaliland; Vestfold Hospital trust, Tønsberg, Norway                                                                    | Ethiopia                                        | Decode Panel                                                   |                                                                                                   |
| Dadi                                     | Marami            |                              |                         | College of Health and Medical Sciences at Haramaya University                                                                                    | Ethiopia                                        | Decode Panel                                                   |                                                                                                   |
| Yunus                                    | Edrids            |                              | MD                      | College of Health and Medical Sciences at Haramaya University                                                                                    | Ethiopia                                        | Decode Panel                                                   |                                                                                                   |
| Mahlet Abayneh                           | Gizaw             |                              | MD                      | St. Paul's Hospital Millennium Medical College in Addis Ababa, Ethiopia                                                                          | Ethiopia                                        | Decode Panel                                                   |                                                                                                   |
| Fentabil                                 | Getnet            |                              | PhD                     | Ethiopian Public Health Institute                                                                                                                | Ethiopia                                        | Data collection                                                |                                                                                                   |

| <b>*First Name and Middle Initial(s)</b> | <b>*Last Name</b> | <b>*Suffix (eg, Jr, III)</b> | <b>Academic Degrees</b> | <b>Institution</b>                                                                                                                                      | <b>Location (city, state/province, country)</b> | <b>Role or Contribution, eg, chair, principal investigator</b> | <b>Group (if more than 1 Group listed in the byline) and/or Subgroup (eg, Steering Committee)</b> |
|------------------------------------------|-------------------|------------------------------|-------------------------|---------------------------------------------------------------------------------------------------------------------------------------------------------|-------------------------------------------------|----------------------------------------------------------------|---------------------------------------------------------------------------------------------------|
| Surafel                                  | Fentaw            |                              | Mphil                   | Ethiopian Public Health Institute                                                                                                                       | Ethiopia                                        | Data collection                                                |                                                                                                   |
| Yasir                                    | Younis            |                              |                         | College of Health and Medical Sciences at Haramaya University                                                                                           | Ethiopia                                        | Decode Panel                                                   |                                                                                                   |
| Anteneh                                  | Belachew          |                              |                         | College of Health and Medical Sciences at Haramaya University                                                                                           | Ethiopia                                        | Decode Panel                                                   |                                                                                                   |
| Ayantu                                   | Mekonnen          |                              |                         | College of Health and Medical Sciences at Haramaya University                                                                                           | Ethiopia                                        | Decode Panel                                                   |                                                                                                   |
| Ephrem                                   | Lemma             |                              |                         | College of Health and Medical Sciences at Haramaya University                                                                                           | Ethiopia                                        | Decode Panel                                                   |                                                                                                   |
| Henok                                    | Wale              |                              |                         | College of Health and Medical Sciences at Haramaya University                                                                                           | Ethiopia                                        | Decode Panel                                                   |                                                                                                   |
| Yenework                                 | Acham             |                              |                         | Ethiopian Public Health Institute                                                                                                                       | Ethiopia                                        | Data collection                                                |                                                                                                   |
| Celso                                    | Monjane           |                              | MD                      | Instituto Nacional de Saúde (INS) in Maputo                                                                                                             | Mozambique                                      | Data collection                                                |                                                                                                   |
| Sheila                                   | Nhachungue        |                              | MD                      | Instituto Nacional de Saúde (INS) in Maputo                                                                                                             | Mozambique                                      | Data collection                                                |                                                                                                   |
| Clara                                    | Menendez          |                              | PhD                     | 1) ISGlobal - Hospital Clínic, Universitat de Barcelona; 2) Centro de Investigacao en Saude de Manhica (CISM), Maputo, Mozambique; 3) CIBERESP, Madrid; | Spain                                           | Data collection                                                |                                                                                                   |
| Justina                                  | Bramugy           |                              | MD                      | Centro de Investigacao en Saude de Manhica (CISM), Maputo, Mozambique                                                                                   | Mozambique                                      | Data collection                                                |                                                                                                   |

| <b>*First Name and Middle Initial(s)</b> | <b>*Last Name</b> | <b>*Suffix (eg, Jr, III)</b> | <b>Academic Degrees</b> | <b>Institution</b>                                                                                                                                                       | <b>Location (city, state/province, country)</b> | <b>Role or Contribution, eg, chair, principal investigator</b> | <b>Group (if more than 1 Group listed in the byline) and/or Subgroup (eg, Steering Committee)</b> |
|------------------------------------------|-------------------|------------------------------|-------------------------|--------------------------------------------------------------------------------------------------------------------------------------------------------------------------|-------------------------------------------------|----------------------------------------------------------------|---------------------------------------------------------------------------------------------------|
| Milton                                   | Kincardett        |                              | MD                      | Centro de Investigacao en Saude de Manhica (CISM), Maputo, Mozambique                                                                                                    | Mozambique                                      | Data collection                                                |                                                                                                   |
| Tacilta                                  | Nhampossa         |                              | PhD                     | Centro de Investigacao en Saude de Manhica (CISM), Maputo, Mozambique; Instituto Nacional Saude, Ministerio Saude, Maputo                                                | Mozambique                                      | Decode Panel                                                   |                                                                                                   |
| Ariel                                    | Nhacolo           |                              | MSc                     | Centro de Investigacao en Saude de Manhica (CISM), Maputo, Mozambique                                                                                                    | Mozambique                                      | Data collection                                                |                                                                                                   |
| Khátia                                   | Munguambe         |                              | PhD                     | Centro de Investigacao en Saude de Manhica (CISM), Maputo, Mozambique; Eduardo Mondlane University, Faculty of Medicine, Community Health Department, Maputo, Mozambique | Mozambique                                      | Data collection                                                |                                                                                                   |
| Pio                                      | Vitorino          |                              | MSc                     | Centro de Investigacao en Saude de Manhica (CISM), Maputo, Mozambique                                                                                                    | Mozambique                                      | Data collection                                                |                                                                                                   |
| Carla                                    | Carrilho          |                              | Phd                     | Department of Pathology, Maputo Central Hospital; Faculty of Medicine, Eduardo Mondlane University, Maputo, Mozambique                                                   | Mozambique                                      | Data collection                                                |                                                                                                   |
| Fabiola                                  | Fernandes         |                              | PhD                     | Department of Pathology, Maputo Central Hospital; Faculty of Medicine, Eduardo Mondlane University, Maputo, Mozambique                                                   | Mozambique                                      | Data collection                                                |                                                                                                   |

| <b>*First Name and Middle Initial(s)</b> | <b>*Last Name</b> | <b>*Suffix (eg, Jr, III)</b> | <b>Academic Degrees</b> | <b>Institution</b>                                                                                                                | <b>Location (city, state/province, country)</b> | <b>Role or Contribution, eg, chair, principal investigator</b> | <b>Group (if more than 1 Group listed in the byline) and/or Subgroup (eg, Steering Committee)</b> |
|------------------------------------------|-------------------|------------------------------|-------------------------|-----------------------------------------------------------------------------------------------------------------------------------|-------------------------------------------------|----------------------------------------------------------------|---------------------------------------------------------------------------------------------------|
| Sozinho                                  | Acácio            |                              | PhD                     | Centro de Investigacao en Saude de Manhica (CISM), Maputo, Mozambique; Instituto Nacional Saude, Ministerio Saude, Maputo         | Mozambique                                      | Decode Panel                                                   |                                                                                                   |
| Maria                                    | Maixenchs         |                              | PhD                     | ISGlobal Hospital Clinic--Universitat de Barcelona, Spain; Centro de Investigacao en Saude de Manhica (CISM), Manhica, Mozambique | Spain                                           | Data collection                                                |                                                                                                   |
| Juan Carlos                              | Hurtado           |                              | MD                      | ISGlobal - Hospital Clínic, Universitat de Barcelona                                                                              | Spain                                           | Decode Panel                                                   |                                                                                                   |
| Jaume                                    | Ordi              |                              | PhD                     | ISGlobal - Hospital Clínic, Universitat de Barcelona                                                                              | Spain                                           | Data collection                                                |                                                                                                   |
| Marta                                    | Valente           |                              | MD                      | ISGlobal - Hospital Clínic, Universitat de Barcelona                                                                              | Spain                                           | Decode Panel                                                   |                                                                                                   |
| Natalia                                  | Rakislova         |                              | PhD                     | ISGlobal - Hospital Clínic, Universitat de Barcelona                                                                              | Mozambique                                      | Decode Panel                                                   |                                                                                                   |
| Dercio                                   | Chitsungo         |                              | MD                      | Quelimane Central Hospital                                                                                                        | Mozambique                                      | Data collection                                                |                                                                                                   |
| Zara                                     | Manhique          |                              | MD                      | Quelimane Central Hospital                                                                                                        | Mozambique                                      | Data collection                                                |                                                                                                   |
| Elisio                                   | Xerinda           |                              | MD                      | Centro de Investigacao en Saude de Manhica (CISM), Maputo, Mozambique                                                             | Mozambique                                      |                                                                |                                                                                                   |
| Charfudin                                | Sacoor            |                              |                         | Centro de Investigacao en Saude de Manhica (CISM), Maputo, Mozambique                                                             | Mozambique                                      |                                                                |                                                                                                   |

| <b>*First Name and Middle Initial(s)</b> | <b>*Last Name</b> | <b>*Suffix (eg, Jr, III)</b> | <b>Academic Degrees</b> | <b>Institution</b>                                                                                                                                                                                                                    | <b>Location (city, state/province, country)</b> | <b>Role or Contribution, eg, chair, principal investigator</b> | <b>Group (if more than 1 Group listed in the byline) and/or Subgroup (eg, Steering Committee)</b> |
|------------------------------------------|-------------------|------------------------------|-------------------------|---------------------------------------------------------------------------------------------------------------------------------------------------------------------------------------------------------------------------------------|-------------------------------------------------|----------------------------------------------------------------|---------------------------------------------------------------------------------------------------|
| Yasmin                                   | Adam              |                              | MD                      | 1) Department of Obstetrics & Gynaecology, Chris Hani Baragwanath Academic Hospital, School of Clinical Medicine, 2) Faculty of Health Sciences, Univeristy of the Witwatersrand, Faculty Health Sciences, Johannesburg, South Africa | South Africa                                    | Data collection                                                |                                                                                                   |
| Sanjay G.                                | Lala              |                              | MD                      | Department of Paediatrics and Perinatal HIV Research Unit, Chris Hani Baragwanath Academic Hospital, Faculty of Health Sciences, University of the Witwatersrand, Johannesburg, South Africa                                          | South Africa                                    | Data collection                                                |                                                                                                   |
| Karen L.                                 | Petersen          |                              | MD                      | Department of Paediatrics, Chris Hani Baragwanath Academic Hospital, Faculty of Health Sciences, University of the Witwatersrand, Johannesburg, South Africa                                                                          | South Africa                                    | Data collection                                                |                                                                                                   |
| Peter J.                                 | Swart             |                              | MD                      | National Health for Laboratory Service in South Africa                                                                                                                                                                                | South Africa                                    | Data collection                                                |                                                                                                   |
| Martin                                   | Hale              |                              | MD                      | National Health Laboratory Service, Department of Anatomical Pathology, School of Pathology, University of the Witwatersrand, Faculty of Health Sciences, Johannesburg, South Africa                                                  | South Africa                                    | Data collection                                                |                                                                                                   |



| <b>*First Name and Middle Initial(s)</b> | <b>*Last Name</b> | <b>*Suffix (eg, Jr, III)</b> | <b>Academic Degrees</b> | <b>Institution</b>                                                                                                                                                                                   | <b>Location (city, state/province, country)</b> | <b>Role or Contribution, eg, chair, principal investigator</b> | <b>Group (if more than 1 Group listed in the byline) and/or Subgroup (eg, Steering Committee)</b> |
|------------------------------------------|-------------------|------------------------------|-------------------------|------------------------------------------------------------------------------------------------------------------------------------------------------------------------------------------------------|-------------------------------------------------|----------------------------------------------------------------|---------------------------------------------------------------------------------------------------|
| Jeannette                                | Wadula            |                              | MD                      | National Health Laboratory Service, Department of Microbiology and Infectious Diseases, School of Pathology, University of the Witwatersrand, Faculty of Health Sciences, Johannesburg, South Africa | South Africa                                    | Data collection                                                |                                                                                                   |
| Jeanie                                   | du Toit           |                              |                         | South African Council Vaccines and Infectious Diseases Analytics Research Unit, University of Witwatersrand                                                                                          | South Africa                                    | Data collection                                                |                                                                                                   |
| Fatima                                   | Solomon           |                              | MD                      | South African Medical Research Council Vaccines and Infectious Diseases Analytics Research Unit, University of the Witwatersrand, Johannesburg, South Africa                                         | South Africa                                    | Data collection                                                |                                                                                                   |
| Vuyelwa                                  | Baba              |                              |                         | University of Witwatersrand, Johannesburg, South Africa                                                                                                                                              | South Africa                                    | Data collection                                                |                                                                                                   |
| Hennie                                   | Lombaard          |                              | MD                      | University of Witwatersrand, Johannesburg, South Africa                                                                                                                                              | South Africa                                    | Data collection                                                |                                                                                                   |
| Nelesh                                   | Govendar          |                              |                         | University of Witwatersrand, Johannesburg, South Africa                                                                                                                                              | South Africa                                    | Data collection                                                |                                                                                                   |
| Amy                                      | Wise              |                              |                         | University of Witwatersrand, Johannesburg, South Africa                                                                                                                                              | South Africa                                    | Data collection                                                |                                                                                                   |

| <b>*First Name and Middle Initial(s)</b> | <b>*Last Name</b> | <b>*Suffix (eg, Jr, III)</b> | Academic Degrees | Institution                                                                                                 | Location (city, state/province, country) | Role or Contribution, eg, chair, principal investigator | Group (if more than 1 Group listed in the byline) and/or Subgroup (eg, Steering Committee) |
|------------------------------------------|-------------------|------------------------------|------------------|-------------------------------------------------------------------------------------------------------------|------------------------------------------|---------------------------------------------------------|--------------------------------------------------------------------------------------------|
| Constance                                | Ntuli             |                              | Auxillary nurse  | South African Council Vaccines and Infectious Diseases Analytics Research Unit, University of Witwatersrand | South Africa                             | Data collection                                         |                                                                                            |
