# Supplementary material for: Causes of Death Among Infants and Children in the Child Health and Mortality Prevention Surveillance (CHAMPS) Network
Source: PubMed Central journal article supplement (PMC10372710; doi:10.1001/jamanetworkopen.2023.22494), 2023-07-26
Supplement: jamanetwopen-e2322494-s003.pdf [file jamanetwopen-e2322494-s003.pdf]

## Data Sharing Statement

Bassat. Causes of Death Among Infants and Children in the Child Health and Mortality Prevention Surveillance (CHAMPS) Network. *JAMA Netw Open*. Published July 26, 2023. doi:10.1001/jamanetworkopen.2023.22494

### Data

**Data available:** Yes

**Data types:** Deidentified participant data

**How to access data:** Data Sharing CHAMPS follows an open approach to data and human sample sharing. Information on CHAMPS data availability can be found at

<https://champshealth.org>. CHAMPS Dataverse: Child Health and Mortality Prevention Surveillance, 2022, "CHAMPS Custom Limited Dataset, v1.0",

<https://doi.org/10.15139/S3/PBEJDU>, UNC Dataverse.

**When available:** With publication

### Supporting Documents

**Document types:** None

### Additional Information

**Who can access the data:** researchers whose proposed use of the data has been approved

**Types of analyses:** For any purpose

**Mechanisms of data availability:** with a signed data access agreement

**Any additional restrictions:** N/A
